# Supplementary material for: Changes in dietary intake during puberty and their determinants: results from the GINIplus birth cohort study
Source: PubMed Central journal article supplement (PMC4556194; doi:10.1186/s12889-015-2189-0), 2015-09-02
Supplement: 12889_2015_2189_MOESM3_ESM.pdf [file 12889_2015_2189_MOESM3_ESM.pdf]

### Additional file 3. Associations with dietary intake changes stratified by baseline intake tertile

**Supplementary Table 3a** Associations<sup>1</sup> with dietary intake changes stratified by baseline tertile in females

| Reference                 | Tracking in T1 <sup>2</sup> | Tracking in T2 <sup>3</sup> |               | Tracking in T3 <sup>4</sup> |
|---------------------------|-----------------------------|-----------------------------|---------------|-----------------------------|
| Change                    | Increase                    | Increase                    | Decrease      | Decrease                    |
| <b>Fruit</b>              |                             |                             |               |                             |
| ParEdu high               | 0.6 (0.3;1.5)               | 1.1 (0.4;3.0)               | 1.0 (0.4;2.5) | 0.5 (0.2;1.3)               |
| Income med                | 2.0 (0.9;4.7)               | 1.0 (0.3;3.2)               | 1.1 (0.4;3.3) | 1.2 (0.5;2.9)               |
| Income high               | 1.9 (0.7;5.2)               | 0.8 (0.2;2.5)               | 1.0 (0.3;3.1) | 1.0 (0.4;2.6)               |
| ChildEdu high             | 1.9 (0.9;4.2)               | 0.9 (0.4;2.5)               | 0.8 (0.3;1.9) | 1.7 (0.7;4.1)               |
| Puberty yes               | 1.3 (0.7;2.7)               | 0.8 (0.3;2.0)               | 1.5 (0.7;3.4) | 0.8 (0.4;1.5)               |
| BMI                       | 1.0 (0.8;1.1)               | 1.1 (0.9;1.3)               | 1.0 (0.8;1.2) | 0.9 (0.8;1.0)               |
| Sed high                  | 1.2 (0.5;3.1)               | 0.8 (0.1;5.3)               | 1.6 (0.4;7.2) | 2.6 (0.4;16.3)              |
| <b>Vegetables</b>         |                             |                             |               |                             |
| ParEdu high               | 1.3 (0.6;3.0)               | 0.5 (0.2;1.3)               | 0.3 (0.1;0.8) | 0.8 (0.3;2.0)               |
| Income med                | 0.4 (0.2;1.0)               | 2.2 (0.7;6.8)               | 1.2 (0.4;4.3) | 0.6 (0.2;1.4)               |
| Income high               | 0.4 (0.1;0.9)               | 1.7 (0.5;6.2)               | 2.0 (0.5;7.6) | 0.5 (0.2;1.2)               |
| ChildEdu high             | 0.8 (0.4;1.7)               | 1.1 (0.4;3.1)               | 1.3 (0.4;3.8) | 0.5 (0.2;1.1)               |
| Puberty yes               | 1.2 (0.6;2.4)               | 1.0 (0.4;2.2)               | 3.0 (1.3;7.4) | 0.8 (0.4;1.5)               |
| BMI                       | 1.0 (0.9;1.2)               | 1.1 (0.9;1.3)               | 0.8 (0.7;1.1) | 0.9 (0.8;1.1)               |
| Sed high                  | 0.5 (0.2;1.4)               | 1.5 (0.3;7.1)               | 1.4 (0.3;7.9) | 0.4 (0.1;2.1)               |
| <b>Starchy vegetables</b> |                             |                             |               |                             |
| ParEdu high               | 0.5 (0.2;1.4)               | 1.9 (0.6;5.7)               | 0.7 (0.3;2.0) | 0.4 (0.1;0.9)               |
| Income med                | 2.2 (0.9;5.7)               | 1.4 (0.4;4.4)               | 1.1 (0.4;3.1) | 0.6 (0.2;1.6)               |
| Income high               | 2.4 (0.9;7.0)               | 1.3 (0.4;4.2)               | 1.1 (0.4;3.0) | 1.4 (0.5;4.1)               |
| ChildEdu high             | 0.7 (0.3;1.6)               | 4.2 (1.4;12.0)              | 2.6 (1.0;6.5) | 1.8 (0.8;4.1)               |
| Puberty yes               | 0.7 (0.4;1.4)               | 0.8 (0.3;1.9)               | 0.4 (0.2;0.9) | 1.0 (0.4;2.1)               |
| BMI                       | 1.0 (0.9;1.2)               | 1.2 (0.9;1.5)               | 1.0 (0.8;1.3) | 1.0 (0.8;1.1)               |
| Sed high                  | 1.5 (0.4;5.3)               | 0.8 (0.2;4.2)               | 0.9 (0.2;4.2) | 0.9 (0.3;3.0)               |
| <b>Refined grain</b>      |                             |                             |               |                             |
| ParEdu high               | 1.7 (0.7;4.0)               | 1.5 (0.5;4.2)               | 1.3 (0.5;3.5) | 0.9 (0.4;2.1)               |
| Income med                | 0.8 (0.3;2.1)               | 1.3 (0.4;4.3)               | 0.5 (0.2;1.4) | 1.4 (0.6;3.4)               |
| Income high               | 0.5 (0.2;1.4)               | 0.6 (0.2;2.2)               | 0.4 (0.1;1.4) | 1.0 (0.4;2.6)               |
| ChildEdu high             | 2.3 (1.0;5.1)               | 0.9 (0.3;2.3)               | 0.5 (0.2;1.2) | 0.9 (0.4;1.9)               |
| Puberty yes               | 1.0 (0.5;2.1)               | 1.2 (0.5;2.9)               | 1.2 (0.5;2.7) | 0.7 (0.4;1.5)               |
| BMI                       | 1.0 (0.8;1.1)               | 1.1 (0.9;1.3)               | 1.0 (0.9;1.2) | 1.0 (0.8;1.1)               |
| Sed high                  | 2.6 (0.7;9.6)               | 2.1 (0.4;11.1)              | 2.1 (0.5;9.3) | 1.9 (0.6;6.1)               |
| <b>Meat</b>               |                             |                             |               |                             |
| ParEdu high               | 1.0 (0.4;2.5)               | 1.7 (0.6;4.2)               | 1.3 (0.5;3.3) | 0.9 (0.4;1.9)               |
| Income med                | 1.1 (0.4;2.7)               | 0.8 (0.3;2.2)               | 1.6 (0.5;4.8) | 0.4 (0.2;1.0)               |
| Income high               | 1.4 (0.5;3.7)               | 0.7 (0.2;2.0)               | 1.5 (0.5;4.6) | 0.4 (0.1;1.1)               |
| ChildEdu high             | 0.4 (0.2;0.9)               | 0.5 (0.2;1.2)               | 0.5 (0.2;1.4) | 1.4 (0.6;3.1)               |
| Puberty yes               | 1.7 (0.8;3.5)               | 1.1 (0.5;2.4)               | 1.4 (0.6;3.2) | 1.4 (0.7;3.0)               |
| BMI                       | 1.0 (0.8;1.2)               | 1.1 (0.9;1.3)               | 1.0 (0.8;1.2) | 0.9 (0.8;1.0)               |
| Sed high                  | 2.3 (0.6;8.3)               | 0.2 (0.0;1.7)               | 0.6 (0.1;3.0) | 0.4 (0.1;1.3)               |
| <b>Fish</b>               |                             |                             |               |                             |
| ParEdu high               | 1.2 (0.5;2.8)               | 0.7 (0.3;1.9)               | 0.8 (0.3;2.2) | 0.4 (0.2;1.0)               |
| Income med                | 0.6 (0.3;1.5)               | 2.1 (0.7;6.2)               | 1.2 (0.4;3.4) | 1.9 (0.7;5.0)               |
| Income high               | 0.5 (0.2;1.3)               | 1.8 (0.6;5.2)               | 1.2 (0.4;3.4) | 1.8 (0.6;4.9)               |
| ChildEdu high             | 1.2 (0.6;2.7)               | 0.7 (0.3;1.8)               | 0.8 (0.3;2.0) | 1.2 (0.5;2.7)               |
| Puberty yes               | 0.8 (0.4;1.5)               | 0.8 (0.3;1.8)               | 0.9 (0.4;1.9) | 0.6 (0.3;1.2)               |
| BMI                       | 1.1 (0.9;1.3)               | 1.1 (0.9;1.3)               | 1.2 (0.9;1.4) | 1.1 (0.9;1.2)               |
| Sed high                  | 1.6 (0.4;6.5)               | 1.6 (0.4;5.9)               | 0.5 (0.1;2.2) | 2.2 (0.7;7.2)               |

|                             |               |                |                |                |
|-----------------------------|---------------|----------------|----------------|----------------|
| <b>Egg</b>                  |               |                |                |                |
| ParEdu high                 | 0.8 (0.4;1.9) | 1.5 (0.5;4.2)  | 1.7 (0.6;4.5)  | 0.5 (0.2;1.3)  |
| Income med                  | 0.6 (0.3;1.6) | 2.2 (0.8;6.0)  | 2.0 (0.7;5.5)  | 1.2 (0.5;2.9)  |
| Income high                 | 0.8 (0.3;2.0) | 3.2 (1.0;10.4) | 2.6 (0.8;8.4)  | 0.6 (0.2;1.6)  |
| ChildEdu high               | 1.1 (0.5;2.3) | 0.3 (0.1;0.8)  | 0.5 (0.2;1.3)  | 1.7 (0.7;3.9)  |
| Puberty yes                 | 1.6 (0.8;3.2) | 1.1 (0.5;2.7)  | 0.6 (0.3;1.5)  | 1.7 (0.8;3.4)  |
| BMI                         | 1.1 (0.9;1.3) | 1.2 (1.0;1.5)  | 1.1 (0.9;1.4)  | 1.0 (0.9;1.2)  |
| Sed high                    | 0.8 (0.3;2.3) | 2.2 (0.5;10.3) | 1.8 (0.4;8.7)  | 0.4 (0.1;1.8)  |
| <b>Butter</b>               |               |                |                |                |
| ParEdu high                 | 0.9 (0.4;2.0) | 0.7 (0.2;2.0)  | 0.8 (0.3;2.6)  | 0.9 (0.3;2.2)  |
| Income med                  | 3.5 (1.3;9.2) | 0.5 (0.1;1.4)  | 1.3 (0.4;3.9)  | 0.7 (0.3;1.7)  |
| Income high                 | 1.3 (0.4;4.1) | 0.9 (0.3;2.8)  | 1.6 (0.5;5.5)  | 1.3 (0.5;3.3)  |
| ChildEdu high               | 0.6 (0.3;1.3) | 2.4 (0.8;7.4)  | 1.0 (0.4;2.5)  | 0.6 (0.3;1.4)  |
| Puberty yes                 | 1.9 (0.9;4.1) | 1.0 (0.4;2.4)  | 0.8 (0.3;1.8)  | 1.0 (0.5;2.1)  |
| BMI                         | 1.0 (0.8;1.1) | 0.9 (0.7;1.1)  | 1.0 (0.9;1.3)  | 1.0 (0.9;1.3)  |
| Sed high                    | 0.8 (0.2;2.7) | 1.0 (0.2;4.9)  | 0.9 (0.2;3.9)  | 2.0 (0.5;7.4)  |
| <b>Margarine</b>            |               |                |                |                |
| ParEdu high                 | 0.3 (0.1;0.7) | 0.9 (0.3;2.2)  | 1.7 (0.5;5.6)  | 1.0 (0.5;2.1)  |
| Income med                  | 1.4 (0.5;3.8) | 0.8 (0.3;2.3)  | 0.3 (0.1;1.1)  | 0.7 (0.3;1.6)  |
| Income high                 | 1.1 (0.3;3.4) | 0.2 (0.1;0.8)  | 0.3 (0.1;0.8)  | 1.1 (0.4;2.9)  |
| ChildEdu high               | 0.8 (0.3;2.0) | 1.6 (0.6;4.3)  | 1.2 (0.4;3.5)  | 0.8 (0.3;1.6)  |
| Puberty yes                 | 0.9 (0.4;1.9) | 1.1 (0.5;2.4)  | 1.5 (0.6;3.7)  | 1.9 (1.0;3.9)  |
| BMI                         | 1.0 (0.8;1.2) | 1.1 (0.9;1.3)  | 1.0 (0.8;1.3)  | 0.9 (0.8;1.0)  |
| Sed high                    | 0.6 (0.1;3.5) | 1.9 (0.5;7.2)  | 0.3 (0.0;2.5)  | 0.9 (0.3;2.7)  |
| <b>Oil</b>                  |               |                |                |                |
| ParEdu high                 | 1.3 (0.6;2.9) | 0.9 (0.3;2.3)  | 0.8 (0.3;2.0)  | 1.3 (0.5;3.2)  |
| Income med                  | 1.8 (0.7;4.5) | 0.9 (0.3;2.8)  | 2.1 (0.6;7.0)  | 0.9 (0.4;2.0)  |
| Income high                 | 1.3 (0.5;3.6) | 0.8 (0.2;2.8)  | 2.0 (0.5;7.6)  | 0.8 (0.3;1.9)  |
| ChildEdu high               | 1.4 (0.6;2.8) | 1.3 (0.5;3.5)  | 0.8 (0.3;2.2)  | 0.8 (0.3;1.8)  |
| Puberty yes                 | 1.7 (0.8;3.5) | 0.9 (0.4;2.2)  | 0.9 (0.4;2.1)  | 1.3 (0.6;2.5)  |
| BMI                         | 1.0 (0.9;1.2) | 1.1 (0.9;1.3)  | 1.0 (0.8;1.2)  | 1.1 (0.9;1.3)  |
| Sed high                    | 0.6 (0.2;2.0) | 3.6 (0.8;16.6) | 0.8 (0.1;5.3)  | 1.0 (0.3;3.0)  |
| <b>Dairy</b>                |               |                |                |                |
| ParEdu high                 | 1.1 (0.5;2.4) | 1.0 (0.4;2.7)  | 0.9 (0.3;2.5)  | 0.4 (0.2;1.0)  |
| Income med                  | 0.9 (0.4;2.0) | 0.7 (0.2;2.0)  | 0.8 (0.2;2.4)  | 0.6 (0.2;1.4)  |
| Income high                 | 0.4 (0.1;0.9) | 0.3 (0.1;0.9)  | 0.5 (0.1;1.7)  | 0.5 (0.2;1.4)  |
| ChildEdu high               | 1.4 (0.6;2.9) | 1.8 (0.6;5.2)  | 1.1 (0.4;3.3)  | 0.9 (0.4;2.0)  |
| Puberty yes                 | 1.4 (0.7;2.7) | 0.9 (0.4;2.0)  | 0.5 (0.2;1.3)  | 1.1 (0.5;2.3)  |
| BMI                         | 1.0 (0.9;1.1) | 1.1 (0.9;1.3)  | 1.1 (0.9;1.3)  | 0.8 (0.7;1.0)  |
| Sed high                    | 0.9 (0.3;2.4) | 0.8 (0.1;4.3)  | 2.9 (0.7;12.0) | 1.8 (0.3;10.4) |
| <b>Sugar-sweetened food</b> |               |                |                |                |
| ParEdu high                 | 0.8 (0.4;2.0) | 0.3 (0.1;0.9)  | 1.2 (0.4;3.7)  | 0.8 (0.3;1.7)  |
| Income med                  | 1.3 (0.5;3.3) | 2.9 (0.9;9.1)  | 1.1 (0.3;3.5)  | 3.1 (1.3;7.5)  |
| Income high                 | 1.0 (0.4;2.7) | 2.5 (0.7;9.2)  | 1.7 (0.5;6.0)  | 1.3 (0.5;3.2)  |
| ChildEdu high               | 0.9 (0.4;2.1) | 0.6 (0.2;1.6)  | 0.4 (0.1;1.1)  | 0.6 (0.3;1.3)  |
| Puberty yes                 | 1.7 (0.8;3.3) | 0.6 (0.2;1.4)  | 0.7 (0.3;1.8)  | 1.8 (0.9;3.5)  |
| BMI                         | 1.0 (0.8;1.2) | 1.0 (0.8;1.2)  | 1.0 (0.8;1.2)  | 1.1 (1.0;1.3)  |
| Sed high                    | 0.7 (0.1;3.7) | 1.3 (0.3;5.5)  | 1.7 (0.4;6.7)  | 0.6 (0.2;1.9)  |
| <b>Caloric drinks</b>       |               |                |                |                |
| ParEdu high                 | 0.7 (0.3;1.7) | 1.1 (0.4;2.8)  | 2.3 (0.7;7.5)  | 0.4 (0.2;0.9)  |
| Income med                  | 1.1 (0.4;2.7) | 0.9 (0.3;2.6)  | 1.1 (0.4;3.4)  | 2.3 (0.9;5.9)  |
| Income high                 | 1.9 (0.7;5.6) | 0.9 (0.3;2.6)  | 1.4 (0.4;4.3)  | 0.9 (0.3;2.4)  |
| ChildEdu high               | 0.6 (0.2;1.3) | 0.3 (0.1;0.8)  | 0.6 (0.2;1.8)  | 2.3 (1.0;5.4)  |
| Puberty yes                 | 1.3 (0.7;2.7) | 0.8 (0.4;1.9)  | 1.3 (0.5;2.9)  | 0.9 (0.4;1.8)  |
| BMI                         | 1.0 (0.9;1.2) | 1.0 (0.9;1.3)  | 1.0 (0.8;1.2)  | 1.1 (0.9;1.2)  |
| Sed high                    | 0.6 (0.1;2.7) | 1.3 (0.2;7.8)  | 2.0 (0.3;12.3) | 1.1 (0.4;3.3)  |

|                             |               |                |                |                |
|-----------------------------|---------------|----------------|----------------|----------------|
| <b>Tea [ml/d]</b>           |               |                |                |                |
| ParEdu high                 | 1.8 (0.8;4.3) | 1.0 (0.3;2.8)  | 0.6 (0.2;1.6)  | 0.8 (0.3;2.1)  |
| Income med                  | 0.6 (0.2;1.7) | 1.3 (0.4;3.8)  | 0.6 (0.2;1.9)  | 0.7 (0.3;1.7)  |
| Income high                 | 0.7 (0.2;2.2) | 0.9 (0.3;2.9)  | 0.5 (0.1;1.7)  | 0.7 (0.3;1.8)  |
| ChildEdu high               | 1.5 (0.7;3.4) | 0.9 (0.3;2.5)  | 1.0 (0.4;2.7)  | 0.8 (0.3;1.8)  |
| Puberty yes                 | 1.7 (0.8;3.5) | 2.2 (1.0;5.0)  | 1.0 (0.4;2.4)  | 1.1 (0.5;2.2)  |
| BMI                         | 1.0 (0.8;1.1) | 0.8 (0.7;1.0)  | 1.0 (0.9;1.2)  | 1.0 (0.9;1.2)  |
| Sed high                    | 0.9 (0.3;3.3) | 1.0 (0.3;3.6)  | 0.3 (0.1;1.8)  | 3.5 (0.8;15.4) |
| <b>Water [ml/d]</b>         |               |                |                |                |
| ParEdu high                 | 0.8 (0.3;1.7) | 1.0 (0.3;2.8)  | 1.0 (0.4;3.1)  | 1.6 (0.6;3.9)  |
| Income med                  | 1.3 (0.5;3.1) | 1.0 (0.3;2.8)  | 0.5 (0.2;1.4)  | 0.8 (0.3;2.0)  |
| Income high                 | 0.9 (0.3;2.2) | 0.9 (0.3;3.0)  | 1.3 (0.5;4.0)  | 0.8 (0.3;2.4)  |
| ChildEdu high               | 1.7 (0.8;3.9) | 1.1 (0.4;2.9)  | 0.5 (0.2;1.3)  | 0.4 (0.2;1.0)  |
| Puberty yes                 | 1.2 (0.6;2.4) | 1.3 (0.5;3.1)  | 1.7 (0.7;4.1)  | 0.9 (0.4;1.8)  |
| BMI                         | 1.1 (0.9;1.3) | 1.1 (0.9;1.3)  | 1.1 (0.9;1.3)  | 0.9 (0.8;1.1)  |
| Sed high                    | 0.7 (0.3;2.0) | 3.6 (0.3;41.4) | 2.7 (0.3;29.8) | 0.6 (0.2;2.5)  |
| <b>Fat</b>                  |               |                |                |                |
| ParEdu high                 | 0.7 (0.3;1.4) | 0.5 (0.2;1.5)  | 0.6 (0.2;1.8)  | 0.7 (0.3;1.7)  |
| Income med                  | 1.1 (0.5;2.6) | 2.2 (0.7;6.5)  | 1.9 (0.6;6.3)  | 0.8 (0.4;1.8)  |
| Income high                 | 0.8 (0.3;2.1) | 2.6 (0.8;8.4)  | 2.0 (0.5;7.2)  | 1.1 (0.4;3.0)  |
| ChildEdu high               | 0.9 (0.4;2.0) | 1.2 (0.5;2.9)  | 1.1 (0.4;3.1)  | 0.8 (0.4;1.6)  |
| Puberty yes                 | 0.9 (0.5;1.8) | 0.8 (0.3;1.7)  | 0.4 (0.2;1.0)  | 1.0 (0.5;2.0)  |
| BMI                         | 0.9 (0.8;1.1) | 1.1 (0.9;1.3)  | 1.1 (0.9;1.4)  | 1.0 (0.9;1.2)  |
| Sed high                    | 0.7 (0.2;2.4) | 2.3 (0.5;10.7) | 2.6 (0.5;13.2) | 1.6 (0.5;5.4)  |
| <b>Carbohydrate</b>         |               |                |                |                |
| ParEdu high                 | 0.8 (0.3;1.9) | 0.4 (0.1;1.2)  | 0.6 (0.2;1.6)  | 1.2 (0.5;2.6)  |
| Income med                  | 0.7 (0.3;1.7) | 2.6 (0.8;8.3)  | 1.1 (0.3;3.4)  | 1.5 (0.6;3.5)  |
| Income high                 | 0.8 (0.3;2.0) | 2.1 (0.6;7.2)  | 1.3 (0.4;4.0)  | 0.7 (0.3;1.9)  |
| ChildEdu high               | 1.6 (0.7;3.5) | 1.0 (0.4;2.5)  | 2.5 (0.9;6.4)  | 0.6 (0.3;1.4)  |
| Puberty yes                 | 1.6 (0.8;3.2) | 1.1 (0.5;2.6)  | 1.5 (0.7;3.4)  | 1.1 (0.5;2.2)  |
| BMI                         | 1.0 (0.8;1.1) | 1.0 (0.8;1.3)  | 1.2 (1.0;1.4)  | 1.0 (0.9;1.2)  |
| Sed high                    | 1.1 (0.3;3.8) | 2.6 (0.5;12.7) | 2.2 (0.5;9.8)  | 0.4 (0.1;1.6)  |
| <b>n3PUFA</b>               |               |                |                |                |
| ParEdu high                 | 0.8 (0.4;1.8) | 0.9 (0.3;2.5)  | 0.5 (0.2;1.3)  | 0.4 (0.2;0.9)  |
| Income med                  | 0.8 (0.3;2.0) | 1.0 (0.4;3.0)  | 2.4 (0.8;7.1)  | 0.6 (0.3;1.4)  |
| Income high                 | 1.0 (0.4;2.7) | 1.1 (0.4;3.2)  | 1.3 (0.4;4.1)  | 0.7 (0.3;1.7)  |
| ChildEdu high               | 1.3 (0.6;2.7) | 1.0 (0.4;2.8)  | 0.5 (0.2;1.2)  | 1.8 (0.8;4.0)  |
| Puberty yes                 | 1.1 (0.6;2.3) | 1.9 (0.8;4.4)  | 0.7 (0.3;1.6)  | 0.5 (0.2;1.0)  |
| BMI                         | 1.0 (0.8;1.1) | 0.8 (0.7;1.0)  | 0.9 (0.8;1.1)  | 1.0 (0.9;1.2)  |
| Sed high                    | 1.0 (0.3;2.8) | 0.3 (0.0;2.3)  | 0.3 (0.1;2.1)  | 0.7 (0.2;2.2)  |
| <b>n6PUFA</b>               |               |                |                |                |
| ParEdu high                 | 1.0 (0.4;2.3) | 2.0 (0.7;5.7)  | 0.6 (0.2;1.7)  | 1.1 (0.5;2.6)  |
| Income med                  | 1.5 (0.6;3.6) | 1.1 (0.4;3.3)  | 2.2 (0.7;7.2)  | 0.6 (0.3;1.4)  |
| Income high                 | 1.0 (0.4;2.6) | 0.4 (0.1;1.3)  | 1.4 (0.4;4.5)  | 0.8 (0.3;2.2)  |
| ChildEdu high               | 0.6 (0.2;1.3) | 0.6 (0.2;1.5)  | 0.7 (0.3;2.1)  | 2.4 (1.0;5.3)  |
| Puberty yes                 | 1.0 (0.5;2.0) | 0.9 (0.4;2.0)  | 0.8 (0.3;1.8)  | 1.1 (0.5;2.2)  |
| BMI                         | 1.1 (0.9;1.4) | 0.9 (0.8;1.1)  | 1.0 (0.8;1.1)  | 1.1 (1.0;1.3)  |
| Sed high                    | 0.3 (0.1;1.5) | 1.3 (0.4;4.6)  | 1.1 (0.2;5.1)  | 0.5 (0.2;1.7)  |
| <b>Beta-Carotene [ml/d]</b> |               |                |                |                |
| ParEdu high                 | 1.8 (0.8;4.0) | 1.3 (0.5;3.3)  | 0.8 (0.3;2.0)  | 1.5 (0.6;4.0)  |
| Income med                  | 1.1 (0.5;2.5) | 0.4 (0.2;1.3)  | 1.4 (0.4;4.8)  | 0.4 (0.2;1.0)  |
| Income high                 | 1.0 (0.4;2.4) | 0.3 (0.1;0.9)  | 1.8 (0.5;6.5)  | 0.4 (0.1;1.0)  |
| ChildEdu high               | 0.8 (0.4;1.7) | 0.8 (0.3;2.1)  | 0.6 (0.2;1.6)  | 0.7 (0.3;1.5)  |
| Puberty yes                 | 1.1 (0.5;2.1) | 1.2 (0.5;2.7)  | 1.4 (0.6;3.2)  | 1.1 (0.6;2.2)  |
| BMI                         | 0.9 (0.8;1.1) | 1.0 (0.8;1.2)  | 0.9 (0.8;1.2)  | 1.0 (0.9;1.2)  |
| Sed high                    | 0.9 (0.3;2.2) | 1.2 (0.2;6.4)  | 3.3 (0.7;14.2) | 4.5 (0.4;45.6) |

**Alpha-Tocopherol [ml/d]**

|               |               |               |               |               |
|---------------|---------------|---------------|---------------|---------------|
| ParEdu high   | 1.9 (0.8;4.3) | 1.9 (0.6;5.7) | 0.3 (0.1;0.9) | 1.3 (0.6;2.8) |
| Income med    | 0.9 (0.4;2.3) | 1.9 (0.6;5.9) | 1.0 (0.4;2.9) | 0.6 (0.3;1.4) |
| Income high   | 0.6 (0.2;1.5) | 1.4 (0.4;4.6) | 0.5 (0.1;1.6) | 0.6 (0.3;1.5) |
| ChildEdu high | 0.7 (0.3;1.6) | 1.1 (0.4;2.8) | 1.1 (0.4;2.9) | 1.3 (0.6;2.7) |
| Puberty yes   | 0.8 (0.4;1.6) | 1.5 (0.7;3.4) | 1.4 (0.6;3.3) | 0.9 (0.4;1.6) |
| BMI           | 0.9 (0.8;1.1) | 0.9 (0.7;1.0) | 0.9 (0.8;1.1) | 1.0 (0.9;1.1) |
| Sed high      | 0.4 (0.1;1.4) | 0.6 (0.1;2.2) | 1.0 (0.3;3.4) | 1.3 (0.3;4.6) |

<sup>1</sup>Odds ratio (95% CI); <sup>2</sup>Logistic regression (increase vs. tracking in lowest tertile). <sup>3</sup>Multinomial logistic regression (increase or decrease vs. tracking in medium tertile), <sup>4</sup>Logistic regression (decrease vs. tracking in highest tertile); ParEdu high: parental education (high vs. low); Income med/high: family income (medium/high vs. low); ChildEdu high: child education (high vs. low); Puberty yes: pubertal onset at baseline (yes vs. no); Screen high: screen-time at baseline (high vs. low). \*p-value < 0.0083 (Bonferroni correction for multiple testing: 0.05/6)

**Supplementary Table 3b** Associations<sup>1</sup> with dietary intake changes stratified by baseline tertile in males

| Reference                               | Tracking in T1 <sup>2</sup> |                | Tracking in T2 <sup>3</sup> |                 | Tracking in T3 <sup>4</sup> |
|-----------------------------------------|-----------------------------|----------------|-----------------------------|-----------------|-----------------------------|
| Change                                  | Increase                    | Increase       | Decrease                    | Decrease        |                             |
| <b>Fruit</b>                            |                             |                |                             |                 |                             |
| ParEdu High                             | 0.8 (0.4;1.9)               | 1.3 (0.4;4.3)  | 1.1 (0.3;3.8)               | 0.8 (0.3;2.1)   |                             |
| Income med                              | 0.9 (0.4;2.2)               | 0.6 (0.2;1.8)  | 0.7 (0.2;2.3)               | 1.2 (0.5;3.2)   |                             |
| Income high                             | 0.6 (0.2;1.5)               | 0.7 (0.2;2.7)  | 0.8 (0.2;3.1)               | 1.1 (0.4;2.9)   |                             |
| School high                             | 2.0 (0.9;4.7)               | 0.3 (0.1;0.9)  | 0.8 (0.2;2.5)               | 0.8 (0.3;2.0)   |                             |
| Puberty yes                             | 0.4 (0.1;1.4)               | 0.5 (0.1;2.8)  | 1.6 (0.3;8.9)               | 1.3 (0.4;3.9)   |                             |
| BMI                                     | 1.0 (0.9;1.2)               | 1.0 (0.8;1.3)  | 0.9 (0.7;1.1)               | 0.8 (0.7;1.0)   |                             |
| Sed high                                | 0.6 (0.2;1.7)               | 3.7 (0.9;16.1) | 0.7 (0.1;4.6)               | 2.3 (0.6;8.9)   |                             |
| <b>Vegetables<sup>5</sup></b>           |                             |                |                             |                 |                             |
| ParEdu High                             | 1.0 (0.4;2.6)               | 1.3 (0.5;4.0)  | 2.5 (0.8;8.2)               | 2.0 (0.8;5.4)   |                             |
| Income med                              | 2.0 (0.8;5.4)               | 0.8 (0.3;2.4)  | 0.8 (0.3;2.8)               | 1.4 (0.5;3.5)   |                             |
| Income high                             | 3.2 (1.1;9.4)               | 0.4 (0.1;1.5)  | 0.6 (0.2;2.2)               | 0.7 (0.3;1.9)   |                             |
| School high                             | 1.0 (0.4;2.5)               | 1.9 (0.6;5.4)  | 2.0 (0.6;6.5)               | 0.9 (0.3;2.1)   |                             |
| Puberty yes                             | 0.4 (0.1;1.4)               | 0.5 (0.1;1.9)  | 1.7 (0.4;7.1)               | 1.3 (0.4;4.2)   |                             |
| BMI                                     | 1.0 (0.9;1.2)               | 1.2 (1.0;1.5)  | 0.9 (0.7;1.1)               | 0.9 (0.8;1.1)   |                             |
| Sed high                                | 0.3 (0.1;0.9)               | 1.9 (0.3;11.7) | 8.3 (1.4;50.0)              | 2.5 (0.6;10.7)  |                             |
| <b>Starchy vegetables<sup>5,6</sup></b> |                             |                |                             |                 |                             |
| ParEdu High                             | 1.3 (0.5;3.5)               | 0.3 (0.1;1.0)  | 0.4 (0.1;1.6)               | 0.7 (0.3;1.6)   |                             |
| Income med                              | 0.6 (0.3;1.7)               | 1.4 (0.5;4.1)  | 2.9 (0.8;10.2)              | 1.7 (0.7;4.1)   |                             |
| Income high                             | 0.4 (0.2;1.2)               | 2.1 (0.6;7.0)  | 3.3 (0.8;13.1)              | 2.4 (0.9;6.7)   |                             |
| School high                             | 1.0 (0.4;2.5)               | 0.8 (0.3;2.4)  | 0.8 (0.2;3.0)               | 2.0 (0.9;4.6)   |                             |
| Puberty yes                             | 0.5 (0.2;1.7)               | -              | -                           | 2.9 (0.8;10.8)  |                             |
| BMI                                     | 1.0 (0.8;1.2)               | 0.8 (0.7;1.0)  | 0.8 (0.6;1.0)               | 1.0 (0.8;1.1)   |                             |
| Sed high                                | 0.5 (0.2;1.9)               | 0.4 (0.1;1.9)  | 0.7 (0.1;3.1)               | 1.3 (0.5;4.0)   |                             |
| <b>Wholegrain</b>                       |                             |                |                             |                 |                             |
| ParEdu High                             | 1.3 (0.6;3.0)               | 2.5 (0.8;8.0)  | 1.4 (0.5;4.4)               | 1.7 (0.6;4.6)   |                             |
| Income med                              | 1.3 (0.5;3.1)               | 0.6 (0.2;1.8)  | 0.6 (0.2;2.0)               | 0.6 (0.2;1.5)   |                             |
| Income high                             | 1.3 (0.5;3.3)               | 1.2 (0.3;4.1)  | 0.7 (0.2;2.4)               | 0.9 (0.3;2.7)   |                             |
| School high                             | 1.4 (0.6;3.4)               | 1.1 (0.4;3.4)  | 0.7 (0.2;1.9)               | 0.3 (0.1;0.9)   |                             |
| Puberty yes                             | 0.9 (0.3;3.0)               | 5.6 (0.5;60.3) | 18.8 (1.9;183.0)            | 1.1 (0.4;3.3)   |                             |
| BMI                                     | 1.1 (1.0;1.3)               | 1.1 (0.9;1.3)  | 0.8 (0.6;1.0)               | 1.0 (0.8;1.2)   |                             |
| Sed high                                | 1.0 (0.4;2.5)               | 1.3 (0.2;7.3)  | 0.9 (0.2;4.7)               | 10.5 (1.6;67.3) |                             |
| <b>Refined grain<sup>5</sup></b>        |                             |                |                             |                 |                             |
| ParEdu High                             | 1.2 (0.4;3.4)               | 1.0 (0.4;2.7)  | 1.2 (0.5;3.2)               | 0.8 (0.3;1.9)   |                             |
| Income med                              | 2.2 (0.8;6.1)               | 1.3 (0.5;3.8)  | 0.7 (0.3;2.0)               | 0.9 (0.4;2.2)   |                             |
| Income high                             | 4.4 (1.3;14.8)              | 0.9 (0.3;2.8)  | 0.3 (0.1;1.0)               | 1.6 (0.6;4.1)   |                             |
| School high                             | 1.3 (0.5;3.6)               | 0.9 (0.3;2.2)  | 0.9 (0.3;2.2)               | 1.4 (0.6;3.4)   |                             |
| Puberty yes                             | 2.9 (0.7;12.7)              | 1.0 (0.2;4.3)  | 0.6 (0.1;2.6)               | 1.6 (0.6;4.5)   |                             |
| BMI                                     | 0.9 (0.7;1.0)               | 1.0 (0.9;1.2)  | 1.0 (0.9;1.2)               | 1.1 (0.9;1.2)   |                             |
| Sed high                                | 1.4 (0.4;4.3)               | 1.0 (0.2;4.2)  | 1.5 (0.4;5.4)               | 1.1 (0.3;3.6)   |                             |
| <b>Meat<sup>5</sup></b>                 |                             |                |                             |                 |                             |
| ParEdu High                             | 0.2 (0.1;0.7)               | 1.9 (0.7;5.3)  | 2.5 (0.9;7.5)               | 1.3 (0.5;3.1)   |                             |
| Income med                              | 2.4 (0.9;6.4)               | 1.3 (0.4;4.2)  | 1.1 (0.3;3.9)               | 1.9 (0.8;4.7)   |                             |
| Income high                             | 0.7 (0.2;2.3)               | 0.5 (0.2;1.7)  | 0.6 (0.2;2.0)               | 1.2 (0.4;3.2)   |                             |
| School high                             | 2.9 (1.0;8.2)               | 0.7 (0.3;2.0)  | 0.8 (0.3;2.3)               | 1.3 (0.5;3.1)   |                             |
| Puberty yes                             | 1.2 (0.3;4.5)               | 0.6 (0.1;2.3)  | 0.6 (0.1;2.5)               | 0.7 (0.2;2.0)   |                             |
| BMI                                     | 1.1 (0.9;1.4)               | 1.1 (0.9;1.3)  | 1.0 (0.8;1.2)               | 1.1 (1.0;1.4)   |                             |
| Sed high                                | 2.2 (0.6;8.6)               | 2.7 (0.6;12.1) | 4.3 (0.9;19.2)              | 0.2 (0.1;0.7)   |                             |
| <b>Fish</b>                             |                             |                |                             |                 |                             |
| ParEdu High                             | 0.8 (0.3;2.0)               | 1.6 (0.6;4.6)  | 2.3 (0.8;7.0)               | 0.7 (0.3;1.8)   |                             |
| Income med                              | 0.6 (0.2;1.6)               | 0.4 (0.1;1.3)  | 0.5 (0.2;1.5)               | 0.8 (0.3;2.0)   |                             |
| Income high                             | 0.6 (0.2;1.7)               | 0.6 (0.2;1.8)  | 0.2 (0.1;0.8)               | 1.2 (0.4;3.2)   |                             |
| School high                             | 1.4 (0.5;3.8)               | 0.8 (0.3;2.1)  | 0.8 (0.3;2.4)               | 1.7 (0.7;4.3)   |                             |

|                           |               |                |                |                |
|---------------------------|---------------|----------------|----------------|----------------|
| Puberty yes               | 1.2 (0.3;4.3) | 1.8 (0.5;7.2)  | 0.7 (0.1;3.5)  | 0.9 (0.3;2.6)  |
| BMI                       | 1.1 (0.9;1.4) | 1.0 (0.8;1.1)  | 1.0 (0.8;1.2)  | 1.3 (1.0;1.6)  |
| Sed high                  | 1.1 (0.3;3.6) | 0.9 (0.3;3.1)  | 0.9 (0.3;3.0)  | 0.9 (0.2;3.7)  |
| <b>Nuts<sup>5</sup></b>   |               |                |                |                |
| ParEdu High               | 1.8 (0.7;4.4) | 0.7 (0.2;2.1)  | 1.3 (0.4;4.0)  | 1.1 (0.4;2.8)  |
| Income med                | 0.5 (0.2;1.3) | 1.0 (0.3;2.7)  | 1.3 (0.4;4.1)  | 0.6 (0.2;1.5)  |
| Income high               | 0.6 (0.2;1.7) | 0.9 (0.3;2.7)  | 1.2 (0.4;4.1)  | 1.1 (0.4;2.8)  |
| School high               | 0.6 (0.2;1.4) | 2.5 (0.9;6.9)  | 1.2 (0.4;3.5)  | 1.3 (0.5;3.3)  |
| Puberty yes               | 0.3 (0.1;1.5) | 1.3 (0.4;4.5)  | 1.6 (0.5;5.7)  | 1.5 (0.5;4.5)  |
| BMI                       | 1.1 (0.9;1.3) | 1.1 (0.9;1.3)  | 1.1 (0.9;1.3)  | 0.8 (0.7;1.0)  |
| Sed high                  | 0.5 (0.2;1.5) | 1.0 (0.3;4.3)  | 1.8 (0.4;7.2)  | 1.0 (0.3;3.8)  |
| <b>Butter<sup>5</sup></b> |               |                |                |                |
| ParEdu High               | 1.1 (0.5;2.9) | 1.3 (0.4;3.9)  | 0.5 (0.2;1.6)  | 0.9 (0.3;2.7)  |
| Income med                | 1.2 (0.4;3.1) | 2.2 (0.7;7.3)  | 0.5 (0.1;1.6)  | 1.4 (0.5;4.0)  |
| Income high               | 1.1 (0.4;3.3) | 2.0 (0.6;7.0)  | 0.6 (0.2;2.4)  | 0.5 (0.2;1.4)  |
| School high               | 1.9 (0.8;4.7) | 1.4 (0.4;4.3)  | 4.2 (1.2;15.4) | 0.5 (0.2;1.5)  |
| Puberty yes               | 1.7 (0.5;5.9) | 0.6 (0.2;2.3)  | 0.6 (0.1;3.1)  | 0.8 (0.2;2.8)  |
| BMI                       | 1.2 (1.0;1.4) | 0.9 (0.8;1.1)  | 0.9 (0.8;1.2)  | 1.0 (0.8;1.2)  |
| Sed high                  | 0.8 (0.3;2.3) | 1.0 (0.2;4.4)  | 1.2 (0.3;5.4)  | 0.3 (0.1;1.8)  |
| <b>Oil</b>                |               |                |                |                |
| ParEdu High               | 2.0 (0.8;5.0) | 0.6 (0.2;1.9)  | 0.4 (0.1;1.4)  | 2.1 (0.8;5.6)  |
| Income med                | 2.7 (1.1;6.6) | 1.7 (0.5;5.5)  | 1.0 (0.3;3.1)  | 3.7 (1.3;10.2) |
| Income high               | 2.2 (0.8;6.3) | 1.1 (0.3;3.3)  | 0.4 (0.1;1.5)  | 1.6 (0.6;4.5)  |
| School high               | 0.7 (0.3;1.6) | 1.5 (0.5;4.7)  | 3.1 (0.9;10.0) | 0.5 (0.2;1.3)  |
| Puberty yes               | 1.5 (0.4;6.1) | 3.0 (0.6;14.7) | 6.8 (1.2;37.2) | 1.0 (0.3;3.3)  |
| BMI                       | 1.0 (0.9;1.2) | 1.0 (0.8;1.2)  | 1.1 (0.9;1.3)  | 1.2 (1.0;1.5)  |
| Sed high                  | 2.2 (0.7;6.7) | 0.2 (0.1;0.9)  | 0.8 (0.2;2.5)  | 1.1 (0.2;6.1)  |
| <b>Dairy</b>              |               |                |                |                |
| ParEdu High               | 1.4 (0.6;3.5) | 1.7 (0.5;5.7)  | 1.0 (0.3;3.2)  | 0.6 (0.2;1.5)  |
| Income med                | 1.3 (0.5;3.2) | 0.9 (0.3;2.8)  | 0.5 (0.1;1.5)  | 1.7 (0.6;4.8)  |
| Income high               | 1.1 (0.4;3.0) | 0.4 (0.1;1.4)  | 0.3 (0.1;1.0)  | 1.5 (0.5;4.4)  |
| School high               | 0.5 (0.2;1.2) | 1.2 (0.4;3.4)  | 2.4 (0.8;7.0)  | 1.2 (0.5;3.0)  |
| Puberty yes               | 2.8 (0.9;8.5) | 4.3 (0.7;27.7) | 4.7 (0.7;31.4) | 0.7 (0.2;2.2)  |
| BMI                       | 0.9 (0.8;1.1) | 0.9 (0.8;1.1)  | 0.9 (0.8;1.1)  | 1.0 (0.9;1.2)  |
| Sed high                  | 0.4 (0.1;1.1) | 2.8 (0.6;13.5) | 2.5 (0.5;13.8) | 2.5 (0.7;9.1)  |
| <b>Caloric drinks</b>     |               |                |                |                |
| ParEdu High               | 1.4 (0.5;3.8) | 4.5 (1.3;15.2) | 0.7 (0.2;2.0)  | 2.2 (0.9;5.6)  |
| Income med                | 0.3 (0.1;0.8) | 0.8 (0.3;2.5)  | 0.8 (0.3;2.4)  | 0.8 (0.3;2.1)  |
| Income high               | 1.0 (0.3;2.8) | 0.6 (0.2;2.1)  | 1.2 (0.4;4.0)  | 1.3 (0.5;3.6)  |
| School high               | 0.8 (0.3;2.2) | 0.8 (0.3;2.3)  | 1.3 (0.5;3.7)  | 0.5 (0.2;1.1)  |
| Puberty yes               | 1.7 (0.5;5.5) | 2.4 (0.6;9.9)  | 2.6 (0.6;10.8) | 1.0 (0.3;3.6)  |
| BMI                       | 1.0 (0.9;1.2) | 1.0 (0.8;1.2)  | 0.9 (0.7;1.1)  | 1.0 (0.9;1.2)  |
| Sed high                  | 2.0 (0.5;8.0) | 3.0 (0.7;12.3) | 1.1 (0.3;4.3)  | 1.7 (0.6;5.0)  |
| <b>Tea [ml/d]</b>         |               |                |                |                |
| ParEdu High               | 1.0 (0.4;2.8) | 1.5 (0.4;5.0)  | 1.3 (0.4;4.5)  | 1.6 (0.7;3.9)  |
| Income med                | 0.6 (0.2;1.8) | 1.1 (0.4;3.4)  | 1.2 (0.4;3.8)  | 0.9 (0.4;2.3)  |
| Income high               | 1.1 (0.4;3.2) | 1.1 (0.3;3.4)  | 1.0 (0.3;3.4)  | 0.5 (0.2;1.5)  |
| School high               | 3.0 (1.2;7.5) | 0.5 (0.1;1.6)  | 0.5 (0.1;1.5)  | 0.5 (0.2;1.1)  |
| Puberty yes               | 0.3 (0.0;2.8) | 1.3 (0.3;5.4)  | 0.7 (0.1;3.7)  | 0.7 (0.3;2.1)  |
| BMI                       | 0.9 (0.8;1.1) | 1.0 (0.8;1.2)  | 0.8 (0.7;1.0)  | 0.9 (0.8;1.1)  |
| Sed high                  | 1.2 (0.4;4.1) | 0.8 (0.2;3.8)  | 1.3 (0.4;4.9)  | 1.0 (0.3;3.4)  |
| <b>Water [ml/d]</b>       |               |                |                |                |
| ParEdu High               | 1.4 (0.5;3.6) | 1.0 (0.4;2.7)  | 1.1 (0.4;3.4)  | 1.0 (0.4;2.6)  |
| Income med                | 0.4 (0.2;1.2) | 2.4 (0.8;7.2)  | 1.6 (0.5;5.1)  | 1.2 (0.4;3.3)  |
| Income high               | 1.0 (0.4;2.6) | 2.1 (0.6;7.4)  | 1.1 (0.3;4.3)  | 1.1 (0.4;3.3)  |
| School high               | 2.7 (1.0;7.4) | 0.8 (0.3;2.0)  | 1.1 (0.4;3.0)  | 0.7 (0.3;1.8)  |

|                                |                |                |                |                |
|--------------------------------|----------------|----------------|----------------|----------------|
| Puberty yes                    | 0.4 (0.1;2.0)  | 1.6 (0.5;5.3)  | 1.1 (0.3;4.7)  | 1.1 (0.3;3.8)  |
| BMI                            | 1.2 (1.0;1.4)  | 1.1 (0.9;1.4)  | 1.2 (1.0;1.5)  | 0.8 (0.7;1.0)  |
| Sed high                       | 0.5 (0.1;1.9)  | 1.2 (0.3;4.0)  | 1.1 (0.3;4.0)  | 0.9 (0.2;3.8)  |
| <b>Protein<sup>5</sup></b>     |                |                |                |                |
| ParEdu High                    | 0.8 (0.3;1.9)  | 1.0 (0.4;2.5)  | 0.5 (0.2;1.6)  | 1.7 (0.7;4.2)  |
| Income med                     | 0.9 (0.4;2.4)  | 0.8 (0.3;2.2)  | 2.2 (0.7;7.5)  | 0.9 (0.3;2.3)  |
| Income high                    | 0.8 (0.3;2.0)  | 0.7 (0.2;2.1)  | 2.2 (0.6;8.4)  | 0.6 (0.2;1.7)  |
| School high                    | 0.8 (0.3;2.0)  | 2.4 (0.9;6.1)  | 2.4 (0.8;7.1)  | 0.5 (0.2;1.2)  |
| Puberty yes                    | 1.8 (0.5;7.0)  | 1.5 (0.4;6.5)  | 1.9 (0.4;9.3)  | 0.8 (0.3;2.2)  |
| BMI                            | 1.1 (0.9;1.3)  | 1.0 (0.8;1.2)  | 1.0 (0.8;1.2)  | 1.0 (0.9;1.2)  |
| Sed high                       | 1.0 (0.3;3.3)  | 1.9 (0.5;6.9)  | 2.6 (0.7;10.5) | 1.1 (0.3;3.8)  |
| <b>Fat</b>                     |                |                |                |                |
| ParEdu High                    | 0.6 (0.2;1.5)  | 0.4 (0.1;1.3)  | 0.8 (0.3;2.2)  | 0.9 (0.3;2.2)  |
| Income med                     | 1.9 (0.7;4.8)  | 0.8 (0.2;2.3)  | 1.3 (0.5;3.6)  | 1.0 (0.4;2.7)  |
| Income high                    | 2.9 (1.0;8.5)  | 0.8 (0.3;2.7)  | 1.1 (0.4;3.2)  | 1.6 (0.6;4.7)  |
| School high                    | 0.8 (0.3;2.1)  | 1.6 (0.5;4.6)  | 1.1 (0.4;2.9)  | 1.1 (0.5;2.7)  |
| Puberty yes                    | 0.7 (0.2;2.8)  | 2.3 (0.6;8.6)  | 1.3 (0.4;4.8)  | 0.7 (0.2;2.3)  |
| BMI                            | 0.9 (0.7;1.1)  | 0.8 (0.7;1.0)  | 0.9 (0.8;1.1)  | 1.1 (0.9;1.3)  |
| Sed high                       | 0.8 (0.2;2.9)  | 8.1 (1.3;48.6) | 7.5 (1.3;42.0) | 1.5 (0.5;4.7)  |
| <b>Carbohydrate</b>            |                |                |                |                |
| ParEdu High                    | 1.9 (0.7;4.8)  | 1.6 (0.6;4.6)  | 0.9 (0.3;2.7)  | 0.5 (0.2;1.4)  |
| Income med                     | 0.8 (0.3;2.1)  | 1.9 (0.6;5.6)  | 0.6 (0.2;1.8)  | 2.2 (0.8;6.0)  |
| Income high                    | 1.1 (0.4;3.0)  | 1.9 (0.6;6.4)  | 0.6 (0.2;2.2)  | 2.4 (0.9;6.6)  |
| School high                    | 0.9 (0.4;2.3)  | 1.6 (0.5;4.4)  | 1.6 (0.5;5.0)  | 0.6 (0.2;1.6)  |
| Puberty yes                    | 0.9 (0.3;2.5)  | 1.6 (0.4;6.4)  | 1.7 (0.4;7.3)  | 0.4 (0.1;1.8)  |
| BMI                            | 1.1 (0.9;1.3)  | 0.9 (0.8;1.1)  | 0.9 (0.7;1.1)  | 0.9 (0.8;1.1)  |
| Sed high                       | 4.3 (1.0;17.7) | 7.0 (1.2;41.0) | 9.4 (1.7;50.9) | 0.5 (0.2;1.8)  |
| <b>n6PUFA</b>                  |                |                |                |                |
| ParEdu High                    | 0.8 (0.3;2.2)  | 1.1 (0.4;3.1)  | 1.9 (0.6;5.9)  | 2.3 (1.0;5.5)  |
| Income med                     | 1.2 (0.4;3.5)  | 1.1 (0.4;3.1)  | 1.4 (0.4;4.3)  | 0.8 (0.3;2.1)  |
| Income high                    | 1.4 (0.5;4.4)  | 0.6 (0.2;2.3)  | 2.0 (0.6;7.1)  | 1.1 (0.4;2.9)  |
| School high                    | 1.7 (0.7;4.5)  | 0.6 (0.2;1.7)  | 1.0 (0.3;3.0)  | 0.9 (0.4;2.1)  |
| Puberty yes                    | 2.2 (0.6;8.5)  | 0.6 (0.1;2.5)  | 0.4 (0.1;2.1)  | 0.6 (0.2;2.0)  |
| BMI                            | 1.1 (0.9;1.3)  | 0.8 (0.6;1.0)  | 0.8 (0.7;1.0)  | 1.1 (0.9;1.3)  |
| Sed high                       | 1.8 (0.6;5.8)  | 0.4 (0.1;1.8)  | 0.7 (0.2;2.6)  | 0.9 (0.2;3.4)  |
| <b>Retinol [ml/d]</b>          |                |                |                |                |
| ParEdu High                    | 1.3 (0.5;3.5)  | 2.3 (0.8;6.4)  | 1.5 (0.5;4.1)  | 1.0 (0.4;2.4)  |
| Income med                     | 0.7 (0.3;1.8)  | 2.5 (0.8;7.7)  | 1.0 (0.4;3.0)  | 0.7 (0.3;1.8)  |
| Income high                    | 0.5 (0.2;1.2)  | 5.1 (1.5;17.2) | 1.1 (0.3;3.8)  | 0.7 (0.2;2.4)  |
| School high                    | 0.7 (0.2;1.7)  | 0.5 (0.2;1.4)  | 1.6 (0.6;4.3)  | 1.0 (0.4;2.7)  |
| Puberty yes                    | 1.0 (0.3;3.2)  | 8.3 (1.3;52.2) | 5.0 (0.8;30.4) | 0.7 (0.2;2.0)  |
| BMI                            | 1.0 (0.8;1.2)  | 1.0 (0.9;1.2)  | 1.1 (1.0;1.4)  | 1.1 (0.9;1.3)  |
| Sed high                       | 1.0 (0.4;2.8)  | 1.4 (0.3;6.9)  | 0.8 (0.2;4.0)  | 0.5 (0.1;1.6)  |
| <b>Beta-Carotene [ml/d]</b>    |                |                |                |                |
| ParEdu High                    | 0.7 (0.3;1.8)  | 0.5 (0.2;1.4)  | 0.6 (0.2;2.0)  | 1.9 (0.7;5.0)  |
| Income med                     | 0.9 (0.3;2.4)  | 0.8 (0.3;2.1)  | 0.5 (0.2;1.5)  | 0.9 (0.3;2.4)  |
| Income high                    | 1.2 (0.4;3.2)  | 0.9 (0.3;3.1)  | 0.7 (0.2;2.4)  | 0.6 (0.2;1.6)  |
| School high                    | 1.7 (0.7;4.2)  | 1.5 (0.5;4.1)  | 1.8 (0.6;5.2)  | 1.0 (0.4;2.7)  |
| Puberty yes                    | 0.7 (0.2;2.7)  | 0.6 (0.2;1.9)  | 0.8 (0.2;2.7)  | 2.1 (0.6;7.8)  |
| BMI                            | 1.0 (0.9;1.2)  | 1.2 (1.0;1.5)  | 1.2 (0.9;1.4)  | 0.8 (0.6;1.0)  |
| Sed high                       | 0.5 (0.2;1.4)  | 0.6 (0.1;2.5)  | 1.3 (0.4;4.9)  | 2.1 (0.4;10.4) |
| <b>Alpha tocopherol [ml/d]</b> |                |                |                |                |
| ParEdu High                    | 1.4 (0.6;3.5)  | 1.3 (0.4;3.9)  | 0.8 (0.3;2.5)  | 1.8 (0.7;4.7)  |
| Income med                     | 1.1 (0.4;2.8)  | 2.1 (0.7;6.8)  | 1.0 (0.3;3.1)  | 0.6 (0.2;1.6)  |
| Income high                    | 1.3 (0.5;3.6)  | 1.4 (0.4;4.9)  | 1.5 (0.4;5.1)  | 0.6 (0.2;1.6)  |
| School high                    | 0.8 (0.3;1.8)  | 0.6 (0.2;1.7)  | 0.6 (0.2;1.8)  | 1.2 (0.4;3.2)  |

|             |               |               |               |                |
|-------------|---------------|---------------|---------------|----------------|
| Puberty yes | 1.0 (0.3;3.0) | 0.6 (0.1;4.1) | 1.0 (0.2;6.0) | 1.9 (0.6;5.8)  |
| BMI         | 0.9 (0.8;1.1) | 1.0 (0.8;1.2) | 0.9 (0.7;1.1) | 1.1 (0.9;1.3)  |
| Sed high    | 2.3 (0.7;7.8) | 0.1 (0.0;1.3) | 1.5 (0.4;5.2) | 6.4 (1.2;33.4) |

---

<sup>1</sup>Odds ratio (95% CI); <sup>2</sup>Logistic regression (increase vs. tracking in lowest tertile). <sup>3</sup>Multinomial logistic regression (increase or decrease vs. tracking in medium tertile), <sup>4</sup>Logistic regression (decrease vs. tracking in highest tertile); <sup>5</sup>Multinomial regression not adjusted for diet change; <sup>6</sup>Multinomial regression not adjusted for pubertal onset; ParEdu high: parental education (high vs. low); Income med/high: family income (medium/high vs. low); ChildEdu high: child education (high vs. low); Puberty yes: pubertal onset at baseline (yes vs. no); Screen high: screen-time at baseline (high vs. low). \*p-value < 0.0083 (Bonferroni correction for multiple testing: 0.05/6)
