# Supplementary material for: Changes in dietary intake during puberty and their determinants: results from the GINIplus birth cohort study
Source: Springer Nature journal article supplement (doi:10.1186/s12889-015-2189-0), 2015-09-01
Supplement: MOESM1 [file 9750220]

# Additional file 1. Associations between exposure variables and baseline food intake tertiles

**Supplementary Table 1a** Associations between exposure variables and baseline food intake tertiles in females

|                           | Parental educ. <sup>1</sup> |        | Family income level <sup>1</sup> |      |        | School level <sup>1</sup> |        | Puberty <sup>1</sup> |      | BMI <sup>2</sup> | Screen time <sup>1</sup> |        |
|---------------------------|-----------------------------|--------|----------------------------------|------|--------|---------------------------|--------|----------------------|------|------------------|--------------------------|--------|
|                           | lower                       | higher | lower                            | med  | higher | lower                     | higher | yes                  | no   |                  | lower                    | higher |
| N                         | 178                         | 445    | 168                              | 229  | 195    | 210                       | 386    | 294                  | 339  | 589              | 578                      | 53     |
| <b>Fruit</b>              |                             |        |                                  |      |        |                           |        |                      |      |                  |                          |        |
| T1                        | 39.3                        | 31.2   | 38.7                             | 34.5 | 26.2   | 41.9                      | 30.8   | 36.7                 | 31.3 | 17.0 (2.4)       | 31.1                     | 54.7   |
| T2                        | 31.5                        | 34.4   | 31.0                             | 32.8 | 37.4   | 34.3                      | 31.1   | 29.9                 | 36.9 | 16.6 (2.4)       | 33.9                     | 30.2   |
| T3                        | 29.2                        | 34.4   | 30.4                             | 32.8 | 36.4   | 23.8                      | 38.1   | 33.3                 | 31.9 | 16.6 (2.3)       | 34.9                     | 15.1   |
| p-value                   | 0.147                       |        | 0.144                            |      |        | 0.001*                    |        | 0.153                |      | 0.285            | 0.001*                   |        |
| <b>Vegetable</b>          |                             |        |                                  |      |        |                           |        |                      |      |                  |                          |        |
| T1                        | 41.0                        | 30.8   | 33.9                             | 36.2 | 31.3   | 38.1                      | 31.1   | 33.0                 | 33.6 | 16.7 (2.4)       | 31.3                     | 52.8   |
| T2                        | 32.6                        | 33.5   | 35.1                             | 34.9 | 29.2   | 34.3                      | 33.4   | 34.4                 | 33.0 | 16.9 (2.3)       | 34.8                     | 22.6   |
| T3                        | 26.4                        | 35.7   | 31.0                             | 28.8 | 39.5   | 27.6                      | 35.5   | 32.7                 | 33.3 | 16.6 (2.3)       | 33.9                     | 24.5   |
| p-value                   | 0.026*                      |        | 0.199                            |      |        | 0.100                     |        | 0.941                |      | 0.644            | 0.006*                   |        |
| <b>Starchy vegetables</b> |                             |        |                                  |      |        |                           |        |                      |      |                  |                          |        |
| T1                        | 23.6                        | 37.5   | 29.8                             | 35.4 | 36.4   | 25.2                      | 36.8   | 34.0                 | 33.0 | 16.8 (2.4)       | 34.3                     | 28.3   |
| T2                        | 36.0                        | 31.7   | 35.7                             | 31.4 | 31.8   | 33.8                      | 33.9   | 35.7                 | 31.3 | 16.3 (1.8)       | 33.4                     | 30.2   |
| T3                        | 40.4                        | 30.8   | 34.5                             | 33.2 | 31.8   | 41.0                      | 29.3   | 30.3                 | 35.7 | 17.1 (2.7)       | 32.4                     | 41.5   |
| p-value                   | 0.003*                      |        | 0.705                            |      |        | 0.004*                    |        | 0.305                |      | 0.008*           | 0.389                    |        |
| <b>Wholegrain</b>         |                             |        |                                  |      |        |                           |        |                      |      |                  |                          |        |
| T1                        | 41.6                        | 30.1   | 35.7                             | 31.4 | 31.3   | 45.2                      | 28.0   | 27.9                 | 38.1 | 16.5 (2.4)       | 32.5                     | 39.6   |
| T2                        | 30.3                        | 35.3   | 31.5                             | 37.1 | 33.3   | 29.5                      | 35.2   | 36.7                 | 30.7 | 16.8 (2.5)       | 33.6                     | 35.8   |
| T3                        | 28.1                        | 34.6   | 32.7                             | 31.4 | 35.4   | 25.2                      | 36.8   | 35.4                 | 31.3 | 16.9 (2.2)       | 33.9                     | 24.5   |
| p-value                   | 0.023*                      |        | 0.707                            |      |        | <0.001*                   |        | 0.025*               |      | 0.351            | 0.349                    |        |
| <b>Refined grain</b>      |                             |        |                                  |      |        |                           |        |                      |      |                  |                          |        |
| T1                        | 41.6                        | 29.7   | 37.5                             | 28.4 | 33.8   | 37.6                      | 32.4   | 33.7                 | 32.4 | 16.5 (2.3)       | 32.7                     | 37.7   |
| T2                        | 29.8                        | 35.1   | 29.8                             | 34.5 | 35.4   | 32.9                      | 34.5   | 32.3                 | 34.5 | 16.8 (2.4)       | 33.7                     | 28.3   |
| T3                        | 28.7                        | 35.3   | 32.7                             | 37.1 | 30.8   | 29.5                      | 33.2   | 34.0                 | 33   | 16.9 (2.4)       | 33.6                     | 34.0   |
| p-value                   | 0.017*                      |        | 0.301                            |      |        | 0.416                     |        | 0.842                |      | 0.214            | 0.669                    |        |
| <b>Meat</b>               |                             |        |                                  |      |        |                           |        |                      |      |                  |                          |        |
| T1                        | 26.4                        | 35.7   | 29.2                             | 35.4 | 33.8   | 27.6                      | 35.5   | 31.6                 | 34.8 | 16.4 (1.9)       | 33.6                     | 34.0   |
| T2                        | 34.3                        | 33.5   | 36.3                             | 27.9 | 37.9   | 30.0                      | 35.5   | 31.0                 | 35.4 | 16.7 (2.3)       | 34.6                     | 17.0   |
| T3                        | 39.3                        | 30.8   | 34.5                             | 36.7 | 28.2   | 42.4                      | 29.0   | 37.4                 | 29.8 | 17.1 (2.8)       | 31.8                     | 49.1   |
| p-value                   | 0.046*                      |        | 0.126                            |      |        | 0.004*                    |        | 0.125                |      | 0.013*           | 0.012*                   |        |
| <b>Fish</b>               |                             |        |                                  |      |        |                           |        |                      |      |                  |                          |        |
| T1                        | 32.0                        | 33.7   | 28.6                             | 37.6 | 31.3   | 34.8                      | 33.9   | 28.2                 | 37.2 | 16.4 (2.2)       | 34.8                     | 20.8   |
| T2                        | 33.7                        | 33.7   | 35.7                             | 30.6 | 33.8   | 29.5                      | 35.5   | 33.0                 | 33.6 | 16.7 (2.2)       | 32.2                     | 43.4   |
| T3                        | 34.3                        | 32.6   | 35.7                             | 31.9 | 34.9   | 35.7                      | 30.6   | 38.8                 | 29.2 | 17.1 (2.6)       | 33.0                     | 35.8   |
| p-value                   | 0.897                       |        | 0.415                            |      |        | 0.274                     |        | 0.017*               |      | 0.019*           | 0.091                    |        |
| <b>Egg</b>                |                             |        |                                  |      |        |                           |        |                      |      |                  |                          |        |
| T1                        | 30.9                        | 33.7   | 31.0                             | 36.2 | 32.8   | 36.2                      | 31.9   | 33.7                 | 33.0 | 16.7 (2.4)       | 32.4                     | 41.5   |
| T2                        | 37.1                        | 31.9   | 36.3                             | 31.4 | 31.3   | 34.3                      | 33.4   | 33.0                 | 33.3 | 16.6 (2.3)       | 33.7                     | 32.1   |
| T3                        | 32.0                        | 34.4   | 32.7                             | 32.3 | 35.9   | 29.5                      | 34.7   | 33.3                 | 33.6 | 16.9 (2.4)       | 33.9                     | 26.4   |
| p-value                   | 0.465                       |        | 0.696                            |      |        | 0.385                     |        | 0.986                |      | 0.446            | 0.352                    |        |
| <b>Nuts</b>               |                             |        |                                  |      |        |                           |        |                      |      |                  |                          |        |
| T1                        | 38.2                        | 31.7   | 31.0                             | 34.1 | 34.9   | 33.8                      | 33.7   | 33.0                 | 33.9 | 16.9 (2.6)       | 32.5                     | 45.3   |
| T2                        | 29.2                        | 35.1   | 36.3                             | 32.8 | 29.7   | 33.3                      | 32.4   | 31.6                 | 34.5 | 16.6 (2.2)       | 33.0                     | 30.2   |
| T3                        | 32.6                        | 33.3   | 32.7                             | 33.2 | 35.4   | 32.9                      | 33.9   | 35.4                 | 31.6 | 16.7 (2.2)       | 34.4                     | 24.5   |

|                             |         |      |       |      |      |         |      |       |      |            |        |      |
|-----------------------------|---------|------|-------|------|------|---------|------|-------|------|------------|--------|------|
| p-value                     | 0.231   |      | 0.760 |      |      | 0.958   |      | 0.571 |      | 0.297      | 0.143  |      |
| <b>Butter</b>               |         |      |       |      |      |         |      |       |      |            |        |      |
| T1                          | 50.0    | 26.5 | 33.3  | 34.9 | 29.7 | 45.2    | 27.5 | 33.0  | 33.3 | 17.0 (2.7) | 32.5   | 47.2 |
| T2                          | 25.3    | 36.9 | 33.9  | 29.7 | 39.5 | 27.6    | 36.0 | 31.3  | 35.7 | 16.7 (2.4) | 33.6   | 30.2 |
| T3                          | 24.7    | 36.6 | 32.7  | 35.4 | 30.8 | 27.1    | 36.5 | 35.7  | 31.0 | 16.5 (2)   | 33.9   | 22.6 |
| p-value                     | <0.001* |      | 0.338 |      |      | <0.001* |      | 0.372 |      | 0.098      | 0.077  |      |
| <b>Margarine</b>            |         |      |       |      |      |         |      |       |      |            |        |      |
| T1                          | 21.3    | 37.8 | 28.0  | 35.4 | 32.3 | 27.6    | 35.5 | 35.0  | 31.3 | 16.5 (2.1) | 34.8   | 18.9 |
| T2                          | 35.4    | 32.4 | 36.9  | 29.3 | 36.9 | 32.9    | 33.4 | 33.0  | 33.6 | 16.7 (2.2) | 33.0   | 34.0 |
| T3                          | 43.3    | 29.9 | 35.1  | 35.4 | 30.8 | 39.5    | 31.1 | 32.0  | 35.1 | 17.1 (2.7) | 32.2   | 47.2 |
| p-value                     | <0.001* |      | 0.303 |      |      | 0.066   |      | 0.562 |      | 0.044*     | 0.031* |      |
| <b>Oil</b>                  |         |      |       |      |      |         |      |       |      |            |        |      |
| T1                          | 39.3    | 31.2 | 31.5  | 32.8 | 35.4 | 37.1    | 31.3 | 31.0  | 35.4 | 17.0 (2.5) | 33.6   | 35.8 |
| T2                          | 36.5    | 31.9 | 29.8  | 34.9 | 33.3 | 32.9    | 34.2 | 36.1  | 31.6 | 16.8 (2.5) | 33.7   | 34.0 |
| T3                          | 24.2    | 36.9 | 38.7  | 32.3 | 31.3 | 30.0    | 34.5 | 33.0  | 33.0 | 16.5 (2.0) | 32.7   | 30.2 |
| p-value                     | 0.009*  |      | 0.569 |      |      | 0.323   |      | 0.391 |      | 0.093      | 0.919  |      |
| <b>Dairy</b>                |         |      |       |      |      |         |      |       |      |            |        |      |
| T1                          | 36.0    | 32.8 | 38.1  | 34.5 | 29.2 | 39.5    | 29.8 | 32.3  | 35.1 | 16.7 (2.5) | 32.2   | 47.2 |
| T2                          | 34.3    | 33.3 | 30.4  | 32.8 | 35.9 | 30.0    | 35.0 | 32.3  | 33.3 | 16.8 (2.3) | 33.4   | 34.0 |
| T3                          | 29.8    | 33.9 | 31.5  | 32.8 | 34.9 | 30.5    | 35.2 | 35.4  | 31.6 | 16.7 (2.2) | 34.4   | 18.9 |
| p-value                     | 0.582   |      | 0.505 |      |      | 0.055   |      | 0.577 |      | 0.786      | 0.033* |      |
| <b>Sugar-sweetened food</b> |         |      |       |      |      |         |      |       |      |            |        |      |
| T1                          | 30.3    | 34.2 | 31.5  | 31.4 | 38.5 | 27.6    | 35.0 | 35.7  | 31.3 | 16.7 (2.2) | 34.1   | 18.9 |
| T2                          | 32.6    | 33.7 | 28.0  | 37.6 | 30.8 | 31.9    | 34.2 | 33.3  | 33.3 | 16.9 (2.4) | 33.0   | 39.6 |
| T3                          | 37.1    | 32.1 | 40.5  | 31.0 | 30.8 | 40.5    | 30.8 | 31.0  | 35.4 | 16.6 (2.4) | 32.9   | 41.5 |
| p-value                     | 0.464   |      | 0.085 |      |      | 0.045*  |      | 0.393 |      | 0.447      | 0.077  |      |
| <b>Caloric drinks</b>       |         |      |       |      |      |         |      |       |      |            |        |      |
| T1                          | 32.0    | 34.2 | 33.9  | 37.6 | 29.7 | 34.3    | 31.9 | 32.7  | 34.2 | 17.0 (2.5) | 34.3   | 22.6 |
| T2                          | 27.5    | 35.3 | 35.7  | 31.0 | 32.8 | 31.4    | 35.0 | 35.7  | 31.3 | 16.7 (2.2) | 34.1   | 28.3 |
| T3                          | 40.4    | 30.6 | 30.4  | 31.4 | 37.4 | 34.3    | 33.2 | 31.6  | 34.5 | 16.6 (2.3) | 31.7   | 49.1 |
| p-value                     | 0.045*  |      | 0.376 |      |      | 0.670   |      | 0.486 |      | 0.282      | 0.032* |      |
| <b>Tea [g/d]</b>            |         |      |       |      |      |         |      |       |      |            |        |      |
| T1                          | 39.3    | 31.2 | 27.4  | 39.3 | 30.8 | 38.6    | 30.6 | 33.3  | 33.6 | 16.8 (2.4) | 33.2   | 32.1 |
| T2                          | 32.0    | 33.7 | 33.3  | 33.2 | 33.8 | 31.9    | 35.5 | 34.4  | 32.4 | 16.8 (2.5) | 33.2   | 37.7 |
| T3                          | 28.7    | 35.1 | 39.3  | 27.5 | 35.4 | 29.5    | 33.9 | 32.3  | 33.9 | 16.7 (2.2) | 33.6   | 30.2 |
| p-value                     | 0.125   |      | 0.061 |      |      | 0.140   |      | 0.861 |      | 0.846      | 0.787  |      |
| <b>Water [g/d]</b>          |         |      |       |      |      |         |      |       |      |            |        |      |
| T1                          | 39.3    | 31.7 | 31.5  | 30.1 | 39.0 | 34.3    | 32.4 | 33.7  | 32.7 | 16.2 (2.0) | 31.8   | 50.9 |
| T2                          | 28.1    | 35.7 | 35.1  | 32.3 | 32.3 | 31.9    | 33.4 | 30.3  | 36.6 | 16.8 (2.6) | 34.8   | 20.8 |
| T3                          | 32.6    | 32.6 | 33.3  | 37.6 | 28.7 | 33.8    | 34.2 | 36.1  | 30.7 | 17.2 (2.3) | 33.4   | 28.3 |
| p-value                     | 0.111   |      | 0.243 |      |      | 0.883   |      | 0.195 |      | <0.001*    | 0.014* |      |
| <b>Protein</b>              |         |      |       |      |      |         |      |       |      |            |        |      |
| T1                          | 33.1    | 33.9 | 35.7  | 31.9 | 31.8 | 32.9    | 34.7 | 32.0  | 34.8 | 16.1 (1.9) | 33.0   | 37.7 |
| T2                          | 30.3    | 34.6 | 32.7  | 33.2 | 34.4 | 30.5    | 35.2 | 31.3  | 34.8 | 16.7 (2.3) | 34.4   | 22.6 |
| T3                          | 36.5    | 31.5 | 31.5  | 34.9 | 33.8 | 36.7    | 30.1 | 36.7  | 30.4 | 17.4 (2.7) | 32.5   | 39.6 |
| p-value                     | 0.426   |      | 0.915 |      |      | 0.235   |      | 0.238 |      | <0.001*    | 0.215  |      |
| <b>Fat</b>                  |         |      |       |      |      |         |      |       |      |            |        |      |
| T1                          | 33.7    | 33.5 | 31.0  | 32.3 | 34.9 | 30.0    | 33.7 | 32.3  | 33.9 | 16.6 (2.3) | 33.7   | 28.3 |
| T2                          | 33.7    | 32.6 | 31.5  | 31.9 | 39.0 | 31.9    | 35.5 | 32.0  | 34.8 | 16.9 (2.2) | 33.6   | 32.1 |
| T3                          | 32.6    | 33.9 | 37.5  | 35.8 | 26.2 | 38.1    | 30.8 | 35.7  | 31.3 | 16.7 (2.5) | 32.7   | 39.6 |
| p-value                     | 0.942   |      | 0.148 |      |      | 0.199   |      | 0.488 |      | 0.504      | 0.559  |      |
| <b>Carbohydrates</b>        |         |      |       |      |      |         |      |       |      |            |        |      |
| T1                          | 34.8    | 33.0 | 36.9  | 38.0 | 25.1 | 36.2    | 32.4 | 35.7  | 31.9 | 16.9 (2.6) | 33.2   | 35.8 |

|                                |         |      |        |      |      |       |      |       |      |            |        |      |
|--------------------------------|---------|------|--------|------|------|-------|------|-------|------|------------|--------|------|
| T2                             | 30.9    | 33.9 | 31.5   | 28.4 | 42.1 | 32.9  | 33.9 | 31.6  | 34.5 | 16.8 (2.2) | 33.0   | 37.7 |
| T3                             | 34.3    | 33.0 | 31.5   | 33.6 | 32.8 | 31.0  | 33.7 | 32.7  | 33.6 | 16.5 (2.3) | 33.7   | 26.4 |
| p-value                        | 0.765   |      | 0.015* |      |      | 0.625 |      | 0.567 |      | 0.282      | 0.547  |      |
| <b>n3 PUFA</b>                 |         |      |        |      |      |       |      |       |      |            |        |      |
| T1                             | 31.5    | 33.9 | 31.0   | 33.6 | 34.4 | 30.5  | 33.9 | 28.6  | 36.9 | 16.5 (2.2) | 32.5   | 37.7 |
| T2                             | 34.3    | 32.6 | 32.7   | 32.3 | 35.4 | 35.2  | 33.7 | 35.7  | 31.3 | 16.7 (2.2) | 34.3   | 26.4 |
| T3                             | 34.3    | 33.5 | 36.3   | 34.1 | 30.3 | 34.3  | 32.4 | 35.7  | 31.9 | 17.0 (2.6) | 33.2   | 35.8 |
| p-value                        | 0.833   |      | 0.789  |      |      | 0.689 |      | 0.086 |      | 0.076      | 0.499  |      |
| <b>n6 PUFA</b>                 |         |      |        |      |      |       |      |       |      |            |        |      |
| T1                             | 32.0    | 33.9 | 29.2   | 34.5 | 36.4 | 29.5  | 35.2 | 29.3  | 36.6 | 16.5 (2)   | 34.8   | 20.8 |
| T2                             | 31.5    | 33.7 | 30.4   | 29.3 | 37.4 | 33.8  | 33.7 | 33.0  | 33.6 | 16.9 (2.5) | 33.0   | 37.7 |
| T3                             | 36.5    | 32.4 | 40.5   | 36.2 | 26.2 | 36.7  | 31.1 | 37.8  | 29.8 | 16.8 (2.5) | 32.2   | 41.5 |
| p-value                        | 0.610   |      | 0.043* |      |      | 0.270 |      | 0.062 |      | 0.206      | 0.109  |      |
| <b>Retinol [mg/d]</b>          |         |      |        |      |      |       |      |       |      |            |        |      |
| T1                             | 25.8    | 36.2 | 29.8   | 28.8 | 40.0 | 27.6  | 35.2 | 33.7  | 33.9 | 16.7 (2.4) | 33.2   | 34.0 |
| T2                             | 34.3    | 32.6 | 36.9   | 34.5 | 29.2 | 34.3  | 33.9 | 32    | 33.3 | 16.7 (2.3) | 33.2   | 37.7 |
| T3                             | 39.9    | 31.2 | 33.3   | 36.7 | 30.8 | 38.1  | 30.8 | 34.4  | 32.7 | 16.8 (2.3) | 33.6   | 28.3 |
| p-value                        | 0.030*  |      | 0.113  |      |      | 0.101 |      | 0.899 |      | 0.977      | 0.702  |      |
| <b>Beta Carotene [mg/d]</b>    |         |      |        |      |      |       |      |       |      |            |        |      |
| T1                             | 42.1    | 29.9 | 37.5   | 31.0 | 34.4 | 38.1  | 31.1 | 28.9  | 38.1 | 16.9 (2.5) | 31.5   | 54.7 |
| T2                             | 37.1    | 32.6 | 30.4   | 34.9 | 29.7 | 33.8  | 32.6 | 35.0  | 31.6 | 16.6 (2.2) | 33.2   | 32.1 |
| T3                             | 20.8    | 37.5 | 32.1   | 34.1 | 35.9 | 28.1  | 36.3 | 36.1  | 30.4 | 16.7 (2.3) | 35.3   | 13.2 |
| p-value                        | <0.001* |      | 0.616  |      |      | 0.092 |      | 0.05  |      | 0.382      | 0.001* |      |
| <b>Vitamin C [mg/d]</b>        |         |      |        |      |      |       |      |       |      |            |        |      |
| T1                             | 32.0    | 33.5 | 34.5   | 34.5 | 32.8 | 34.8  | 33.2 | 30.6  | 36.3 | 16.8 (2.2) | 32.2   | 49.1 |
| T2                             | 34.8    | 32.6 | 33.3   | 35.8 | 30.8 | 34.8  | 31.3 | 36.7  | 30.1 | 16.7 (2.5) | 33.9   | 22.6 |
| T3                             | 33.1    | 33.9 | 32.1   | 29.7 | 36.4 | 30.5  | 35.5 | 32.7  | 33.6 | 16.6 (2.3) | 33.9   | 28.3 |
| p-value                        | 0.861   |      | 0.666  |      |      | 0.448 |      | 0.162 |      | 0.713      | 0.040* |      |
| <b>alpha tocopherol [mg/d]</b> |         |      |        |      |      |       |      |       |      |            |        |      |
| T1                             | 34.3    | 32.1 | 34.5   | 30.6 | 33.8 | 32.9  | 33.2 | 29.6  | 36.6 | 16.7 (2.3) | 33.4   | 35.8 |
| T2                             | 29.2    | 35.3 | 28.0   | 35.8 | 35.4 | 30.5  | 35.5 | 33.7  | 33.3 | 16.8 (2.4) | 32.7   | 39.6 |
| T3                             | 36.5    | 32.6 | 37.5   | 33.6 | 30.8 | 36.7  | 31.3 | 36.7  | 30.1 | 16.7 (2.3) | 33.9   | 24.5 |
| p-value                        | 0.340   |      | 0.422  |      |      | 0.337 |      | 0.110 |      | 0.944      | 0.354  |      |

<sup>1</sup> Presented as percentage and tested using Pearson's  $\chi^2$  test for count data; <sup>2</sup> Presented as mean (standard deviation) and tested using one-way analysis of variance; \*p-value <0.05

**Supplementary Table 1b** Associations between exposure variables and baseline food intake tertiles in males

|                           | Parental educ. <sup>1</sup> |        | Family income level <sup>1</sup> |      |        | School level <sup>1</sup> |        | Puberty <sup>1</sup> |      | BMI <sup>2</sup> | Screen time <sup>1</sup> |        |
|---------------------------|-----------------------------|--------|----------------------------------|------|--------|---------------------------|--------|----------------------|------|------------------|--------------------------|--------|
|                           | lower                       | higher | lower                            | med  | higher | lower                     | higher | yes                  | no   |                  | lower                    | higher |
| N                         | 211                         | 357    | 166                              | 196  | 174    | 215                       | 337    | 63                   | 516  | 527              | 523                      | 61     |
| <b>Fruit</b>              |                             |        |                                  |      |        |                           |        |                      |      |                  |                          |        |
| T1                        | 39.3                        | 30.8   | 41.0                             | 33.2 | 27.6   | 38.6                      | 29.4   | 36.5                 | 33.1 | 16.8 (2.3)       | 31.0                     | 52.5   |
| T2                        | 33.6                        | 33.3   | 28.9                             | 33.2 | 34.5   | 30.2                      | 34.4   | 27.0                 | 34.1 | 16.9 (2.3)       | 34.0                     | 27.9   |
| T3                        | 27.0                        | 35.9   | 30.1                             | 33.7 | 37.9   | 31.2                      | 36.2   | 36.5                 | 32.8 | 16.7 (2.3)       | 35.0                     | 19.7   |
| p-value                   | 0.049*                      |        | 0.138                            |      |        | 0.079                     |        | 0.526                |      | 0.726            | 0.002*                   |        |
| <b>Vegetable</b>          |                             |        |                                  |      |        |                           |        |                      |      |                  |                          |        |
| T1                        | 33.6                        | 34.5   | 38.6                             | 34.7 | 28.2   | 38.1                      | 30.0   | 28.6                 | 34.1 | 16.7 (2.3)       | 31.4                     | 49.2   |
| T2                        | 38.4                        | 30.3   | 33.7                             | 31.6 | 32.2   | 33.5                      | 33.5   | 36.5                 | 32.8 | 16.9 (2.1)       | 33.8                     | 27.9   |
| T3                        | 28.0                        | 35.3   | 27.7                             | 33.7 | 39.7   | 28.4                      | 36.5   | 34.9                 | 33.1 | 16.9 (2.5)       | 34.8                     | 23.0   |
| p-value                   | 0.088                       |        | 0.164                            |      |        | 0.073                     |        | 0.668                |      | 0.579            | 0.017*                   |        |
| <b>Starchy vegetables</b> |                             |        |                                  |      |        |                           |        |                      |      |                  |                          |        |
| T1                        | 27.0                        | 37.5   | 28.9                             | 34.2 | 35.6   | 30.2                      | 35.9   | 49.2                 | 31.4 | 16.4 (2.1)       | 34.0                     | 29.5   |
| T2                        | 31.3                        | 34.5   | 34.9                             | 32.1 | 33.9   | 28.4                      | 35.6   | 23.8                 | 34.7 | 16.8 (2.1)       | 33.3                     | 32.8   |
| T3                        | 41.7                        | 28.0   | 36.1                             | 33.7 | 30.5   | 41.4                      | 28.5   | 27.0                 | 33.9 | 17.4 (2.6)       | 32.7                     | 37.7   |
| p-value                   | 0.002*                      |        | 0.675                            |      |        | 0.007*                    |        | 0.017*               |      | <0.001*          | 0.687                    |        |
| <b>Wholegrain</b>         |                             |        |                                  |      |        |                           |        |                      |      |                  |                          |        |
| T1                        | 44.1                        | 27.7   | 37.3                             | 31.1 | 33.3   | 42.8                      | 28.2   | 27.0                 | 34.7 | 16.9 (2.3)       | 31.2                     | 52.5   |
| T2                        | 33.2                        | 33.3   | 31.3                             | 33.2 | 33.9   | 31.6                      | 34.1   | 31.7                 | 32.9 | 16.8 (2.4)       | 34.6                     | 24.6   |
| T3                        | 22.7                        | 38.9   | 31.3                             | 35.7 | 32.8   | 25.6                      | 37.7   | 41.3                 | 32.4 | 16.7 (2.1)       | 34.2                     | 23.0   |
| p-value                   | <0.001*                     |        | 0.776                            |      |        | 0.001*                    |        | 0.310                |      | 0.742            | 0.004*                   |        |
| <b>Refined grain</b>      |                             |        |                                  |      |        |                           |        |                      |      |                  |                          |        |
| T1                        | 33.2                        | 33.6   | 30.1                             | 33.2 | 32.8   | 34.4                      | 32.6   | 28.6                 | 34.1 | 16.7 (2.4)       | 33.8                     | 31.1   |
| T2                        | 36.5                        | 31.7   | 37.3                             | 30.1 | 33.9   | 40.0                      | 29.7   | 31.7                 | 33.3 | 16.8 (2.2)       | 32.9                     | 36.1   |
| T3                        | 30.3                        | 34.7   | 32.5                             | 36.7 | 33.3   | 25.6                      | 37.7   | 39.7                 | 32.6 | 17.0 (2.3)       | 33.3                     | 32.8   |
| p-value                   | 0.425                       |        | 0.691                            |      |        | 0.006*                    |        | 0.494                |      | 0.542            | 0.866                    |        |
| <b>Meat</b>               |                             |        |                                  |      |        |                           |        |                      |      |                  |                          |        |
| T1                        | 27.5                        | 36.4   | 33.7                             | 35.2 | 31.0   | 27.0                      | 37.1   | 30.2                 | 33.3 | 16.3 (2.0)       | 34.0                     | 29.5   |
| T2                        | 35.1                        | 31.7   | 32.5                             | 31.6 | 37.4   | 33.5                      | 33.2   | 33.3                 | 33.5 | 16.9 (2.4)       | 32.9                     | 34.4   |
| T3                        | 37.4                        | 31.9   | 33.7                             | 33.2 | 31.6   | 39.5                      | 29.7   | 36.5                 | 33.1 | 17.3 (2.3)       | 33.1                     | 36.1   |
| p-value                   | 0.089                       |        | 0.805                            |      |        | 0.020*                    |        | 0.834                |      | <0.001*          | 0.772                    |        |
| <b>Fish</b>               |                             |        |                                  |      |        |                           |        |                      |      |                  |                          |        |
| T1                        | 32.7                        | 33.6   | 33.1                             | 31.1 | 33.9   | 35.3                      | 32.0   | 34.9                 | 32.8 | 16.6 (2.1)       | 33.3                     | 31.1   |
| T2                        | 32.2                        | 34.5   | 33.7                             | 35.2 | 32.8   | 31.2                      | 35.9   | 25.4                 | 34.7 | 17.1 (2.4)       | 32.7                     | 41.0   |
| T3                        | 35.1                        | 31.9   | 33.1                             | 33.7 | 33.3   | 33.5                      | 32.0   | 39.7                 | 32.6 | 16.8 (2.4)       | 34.0                     | 27.9   |
| p-value                   | 0.732                       |        | 0.982                            |      |        | 0.502                     |        | 0.305                |      | 0.086            | 0.404                    |        |
| <b>Egg</b>                |                             |        |                                  |      |        |                           |        |                      |      |                  |                          |        |
| T1                        | 35.5                        | 31.9   | 30.7                             | 35.2 | 32.2   | 36.7                      | 31.5   | 34.9                 | 33.3 | 17.0 (2.4)       | 32.5                     | 41.0   |
| T2                        | 30.8                        | 35.3   | 31.9                             | 34.2 | 32.8   | 33.0                      | 33.2   | 30.2                 | 33.3 | 16.6 (2.1)       | 33.8                     | 27.9   |
| T3                        | 33.6                        | 32.8   | 37.3                             | 30.6 | 35.1   | 30.2                      | 35.3   | 34.9                 | 33.3 | 16.9 (2.4)       | 33.7                     | 31.1   |
| p-value                   | 0.510                       |        | 0.738                            |      |        | 0.348                     |        | 0.880                |      | 0.187            | 0.393                    |        |
| <b>Nuts</b>               |                             |        |                                  |      |        |                           |        |                      |      |                  |                          |        |
| T1                        | 37.0                        | 31.1   | 34.3                             | 31.1 | 32.2   | 39.5                      | 29.4   | 27.0                 | 34.1 | 16.9 (2.4)       | 32.1                     | 44.3   |
| T2                        | 31.3                        | 33.9   | 30.1                             | 35.2 | 33.3   | 32.1                      | 34.1   | 38.1                 | 33.1 | 16.9 (2.4)       | 33.8                     | 27.9   |
| T3                        | 31.8                        | 35.0   | 35.5                             | 33.7 | 34.5   | 28.4                      | 36.5   | 34.9                 | 32.8 | 16.7 (2.1)       | 34.0                     | 27.9   |
| p-value                   | 0.356                       |        | 0.895                            |      |        | 0.033*                    |        | 0.511                |      | 0.822            | 0.164                    |        |
| <b>Butter</b>             |                             |        |                                  |      |        |                           |        |                      |      |                  |                          |        |
| T1                        | 48.8                        | 24.9   | 39.8                             | 31.6 | 32.2   | 44.7                      | 26.1   | 27.0                 | 34.1 | 17.0 (2.4)       | 31.9                     | 47.5   |
| T2                        | 29.4                        | 35.6   | 31.9                             | 32.7 | 32.2   | 31.6                      | 33.8   | 44.4                 | 32.0 | 16.9 (2.4)       | 33.3                     | 31.1   |

|                             |         |      |        |      |      |         |      |       |      |            |      |        |
|-----------------------------|---------|------|--------|------|------|---------|------|-------|------|------------|------|--------|
| T3                          | 21.8    | 39.5 | 28.3   | 35.7 | 35.6 | 23.7    | 40.1 | 28.6  | 33.9 | 16.5 (2.0) | 34.8 | 21.3   |
| p-value                     | <0.001* |      | 0.413  |      |      | <0.001* |      | 0.138 |      | 0.097      |      | 0.030* |
| <b>Margarine</b>            |         |      |        |      |      |         |      |       |      |            |      |        |
| T1                          | 23.2    | 38.7 | 27.7   | 39.3 | 35.1 | 23.3    | 40.4 | 38.1  | 32.8 | 16.7 (2.1) | 34.4 | 23.0   |
| T2                          | 33.6    | 32.8 | 31.9   | 29.6 | 35.6 | 36.3    | 31.5 | 33.3  | 33.1 | 16.7 (2.2) | 32.9 | 37.7   |
| T3                          | 43.1    | 28.6 | 40.4   | 31.1 | 29.3 | 40.5    | 28.2 | 28.6  | 34.1 | 17.1 (2.5) | 32.7 | 39.3   |
| p-value                     | <0.001* |      | 0.085  |      |      | <0.001* |      | 0.608 |      | 0.189      |      | 0.195  |
| <b>Oil</b>                  |         |      |        |      |      |         |      |       |      |            |      |        |
| T1                          | 41.7    | 29.1 | 39.8   | 34.7 | 24.1 | 40.5    | 29.4 | 22.2  | 34.7 | 16.7 (2.3) | 32.7 | 42.6   |
| T2                          | 33.6    | 33.1 | 33.1   | 30.6 | 38.5 | 34.0    | 32.6 | 38.1  | 32.9 | 17.0 (2.4) | 32.7 | 37.7   |
| T3                          | 24.6    | 37.8 | 27.1   | 34.7 | 37.4 | 25.6    | 38.0 | 39.7  | 32.4 | 16.8 (2.2) | 34.6 | 19.7   |
| p-value                     | 0.001*  |      | 0.024* |      |      | 0.004*  |      | 0.137 |      | 0.539      |      | 0.058  |
| <b>Dairy</b>                |         |      |        |      |      |         |      |       |      |            |      |        |
| T1                          | 37.0    | 31.9 | 34.9   | 33.2 | 31.6 | 34.0    | 32.6 | 41.3  | 32.9 | 16.9 (2.4) | 32.3 | 42.6   |
| T2                          | 33.2    | 31.9 | 34.9   | 31.6 | 34.5 | 31.6    | 34.7 | 27.0  | 33.9 | 16.7 (2.3) | 33.3 | 32.8   |
| T3                          | 29.9    | 36.1 | 30.1   | 35.2 | 33.9 | 34.4    | 32.6 | 31.7  | 33.1 | 16.9 (2.2) | 34.4 | 24.6   |
| p-value                     | 0.272   |      | 0.848  |      |      | 0.753   |      | 0.369 |      | 0.617      |      | 0.190  |
| <b>Sugar-sweetened food</b> |         |      |        |      |      |         |      |       |      |            |      |        |
| T1                          | 26.1    | 37.3 | 25.9   | 35.2 | 41.4 | 30.2    | 36.2 | 41.3  | 32.6 | 17.1 (2.3) | 34.2 | 27.9   |
| T2                          | 33.6    | 33.1 | 33.1   | 33.7 | 33.3 | 30.7    | 34.7 | 30.2  | 33.3 | 16.9 (2.1) | 34.2 | 26.2   |
| T3                          | 40.3    | 29.7 | 41.0   | 31.1 | 25.3 | 39.1    | 29.1 | 28.6  | 34.1 | 16.5 (2.4) | 31.5 | 45.9   |
| p-value                     | 0.009*  |      | 0.013* |      |      | 0.050   |      | 0.376 |      | 0.057      |      | 0.078  |
| <b>Caloric drinks</b>       |         |      |        |      |      |         |      |       |      |            |      |        |
| T1                          | 32.2    | 34.5 | 30.7   | 34.2 | 31.0 | 32.1    | 34.1 | 33.3  | 33.5 | 16.8 (2.3) | 34.2 | 24.6   |
| T2                          | 32.7    | 33.1 | 37.3   | 31.6 | 32.8 | 31.6    | 34.4 | 38.1  | 32.8 | 16.9 (2.3) | 32.5 | 39.3   |
| T3                          | 35.1    | 32.5 | 31.9   | 34.2 | 36.2 | 36.3    | 31.5 | 28.6  | 33.7 | 16.8 (2.3) | 33.3 | 36.1   |
| p-value                     | 0.793   |      | 0.767  |      |      | 0.500   |      | 0.628 |      | 0.867      |      | 0.298  |
| <b>Tea [g/d]</b>            |         |      |        |      |      |         |      |       |      |            |      |        |
| T1                          | 36.5    | 30.8 | 28.9   | 34.7 | 35.1 | 39.5    | 30.9 | 30.2  | 33.9 | 16.9 (2.4) | 32.7 | 39.3   |
| T2                          | 34.6    | 33.6 | 37.3   | 28.6 | 32.8 | 33.5    | 32.3 | 30.2  | 33.7 | 16.9 (2.4) | 33.1 | 36.1   |
| T3                          | 28.9    | 35.6 | 33.7   | 36.7 | 32.2 | 27.0    | 36.8 | 39.7  | 32.4 | 16.7 (2.1) | 34.2 | 24.6   |
| p-value                     | 0.210   |      | 0.415  |      |      | 0.034*  |      | 0.507 |      | 0.595      |      | 0.302  |
| <b>Water [g/d]</b>          |         |      |        |      |      |         |      |       |      |            |      |        |
| T1                          | 39.3    | 30.0 | 41.6   | 28.1 | 33.9 | 37.7    | 30.6 | 28.6  | 34.5 | 16.5 (2.3) | 33.5 | 37.7   |
| T2                          | 30.3    | 35.0 | 28.9   | 38.3 | 33.3 | 28.8    | 36.8 | 34.9  | 32.9 | 16.8 (2.2) | 33.1 | 34.4   |
| T3                          | 30.3    | 35.0 | 29.5   | 33.7 | 32.8 | 33.5    | 32.6 | 36.5  | 32.6 | 17.2 (2.4) | 33.5 | 27.9   |
| p-value                     | 0.073   |      | 0.105  |      |      | 0.106   |      | 0.633 |      | 0.035*     |      | 0.657  |
| <b>Protein</b>              |         |      |        |      |      |         |      |       |      |            |      |        |
| T1                          | 30.3    | 34.7 | 36.7   | 32.7 | 32.2 | 30.2    | 35.3 | 25.4  | 34.3 | 16.4 (2.1) | 33.3 | 34.4   |
| T2                          | 34.1    | 33.3 | 33.7   | 33.7 | 33.3 | 33.0    | 33.8 | 30.2  | 33.9 | 16.7 (2.2) | 32.5 | 41.0   |
| T3                          | 35.5    | 31.9 | 29.5   | 33.7 | 34.5 | 36.7    | 30.9 | 44.4  | 31.8 | 17.4 (2.5) | 34.2 | 24.6   |
| p-value                     | 0.517   |      | 0.847  |      |      | 0.299   |      | 0.117 |      | <0.001*    |      | 0.256  |
| <b>Fat</b>                  |         |      |        |      |      |         |      |       |      |            |      |        |
| T1                          | 34.1    | 32.2 | 29.5   | 38.8 | 31.6 | 29.8    | 34.7 | 28.6  | 33.7 | 16.6 (2.3) | 33.3 | 34.4   |
| T2                          | 33.2    | 33.3 | 36.1   | 31.1 | 36.8 | 32.1    | 35.0 | 36.5  | 33.1 | 17.1 (2.4) | 33.5 | 32.8   |
| T3                          | 32.7    | 34.5 | 34.3   | 30.1 | 31.6 | 38.1    | 30.3 | 34.9  | 33.1 | 16.8 (2.1) | 33.3 | 32.8   |
| p-value                     | 0.874   |      | 0.387  |      |      | 0.153   |      | 0.707 |      | 0.083      |      | 0.984  |
| <b>Carbohydrates</b>        |         |      |        |      |      |         |      |       |      |            |      |        |
| T1                          | 34.6    | 33.6 | 31.9   | 27.6 | 38.5 | 36.3    | 31.8 | 42.9  | 32.4 | 17.1 (2.3) | 33.7 | 31.1   |
| T2                          | 33.2    | 33.6 | 34.9   | 38.3 | 28.7 | 35.8    | 32.0 | 33.3  | 33.5 | 16.9 (2.3) | 33.3 | 34.4   |
| T3                          | 32.2    | 32.8 | 33.1   | 34.2 | 32.8 | 27.9    | 36.2 | 23.8  | 34.1 | 16.4 (2.2) | 33.1 | 34.4   |
| p-value                     | 0.972   |      | 0.200  |      |      | 0.129   |      | 0.161 |      | 0.019*     |      | 0.926  |
| <b>n3 PUFA</b>              |         |      |        |      |      |         |      |       |      |            |      |        |

|                                |        |      |       |      |      |         |      |        |      |            |        |      |
|--------------------------------|--------|------|-------|------|------|---------|------|--------|------|------------|--------|------|
| T1                             | 31.8   | 34.5 | 33.1  | 35.7 | 31.6 | 30.2    | 36.2 | 31.7   | 33.5 | 16.4 (1.9) | 32.3   | 42.6 |
| T2                             | 30.3   | 35.0 | 35.5  | 31.6 | 33.3 | 31.6    | 32.3 | 34.9   | 33.1 | 16.9 (2.4) | 34.0   | 27.9 |
| T3                             | 37.9   | 30.5 | 31.3  | 32.7 | 35.1 | 38.1    | 31.5 | 33.3   | 33.3 | 17.3 (2.4) | 33.7   | 29.5 |
| p-value                        | 0.189  |      | 0.868 |      |      | 0.210   |      | 0.948  |      | 0.001*     | 0.267  |      |
| <b>n6 PUFA</b>                 |        |      |       |      |      |         |      |        |      |            |        |      |
| T1                             | 28.9   | 35.9 | 27.7  | 36.2 | 36.8 | 30.2    | 36.2 | 28.6   | 33.7 | 16.4 (2.1) | 33.3   | 36.1 |
| T2                             | 36.5   | 31.7 | 35.5  | 32.1 | 28.7 | 33.0    | 32.0 | 31.7   | 33.7 | 16.8 (2.3) | 32.9   | 36.1 |
| T3                             | 34.6   | 32.5 | 36.7  | 31.6 | 34.5 | 36.7    | 31.8 | 39.7   | 32.6 | 17.2 (2.4) | 33.8   | 27.9 |
| p-value                        | 0.220  |      | 0.337 |      |      | 0.303   |      | 0.504  |      | 0.005*     | 0.644  |      |
| <b>Retinol [mg/d]</b>          |        |      |       |      |      |         |      |        |      |            |        |      |
| T1                             | 32.7   | 34.2 | 33.1  | 32.7 | 35.1 | 34.0    | 33.2 | 31.7   | 33.1 | 16.5 (2.1) | 32.9   | 37.7 |
| T2                             | 31.8   | 33.1 | 31.3  | 32.7 | 35.1 | 30.2    | 36.5 | 28.6   | 33.9 | 16.8 (2.4) | 34.2   | 26.2 |
| T3                             | 35.5   | 32.8 | 35.5  | 34.7 | 29.9 | 35.8    | 30.3 | 39.7   | 32.9 | 17.1 (2.4) | 32.9   | 36.1 |
| p-value                        | 0.796  |      | 0.824 |      |      | 0.249   |      | 0.530  |      | 0.045*     | 0.451  |      |
| <b>Beta Carotene [mg/d]</b>    |        |      |       |      |      |         |      |        |      |            |        |      |
| T1                             | 39.3   | 30.3 | 34.3  | 30.6 | 34.5 | 43.7    | 26.7 | 27.0   | 33.7 | 16.7 (2.3) | 31.5   | 47.5 |
| T2                             | 35.5   | 32.8 | 36.1  | 34.7 | 28.7 | 33.0    | 34.1 | 41.3   | 32.4 | 17.2 (2.2) | 32.9   | 36.1 |
| T3                             | 25.1   | 37.0 | 29.5  | 34.7 | 36.8 | 23.3    | 39.2 | 31.7   | 33.9 | 16.6 (2.3) | 35.6   | 16.4 |
| p-value                        | 0.010* |      | 0.469 |      |      | <0.001* |      | 0.335  |      | 0.057      | 0.006* |      |
| <b>Vitamin C [mg/d]</b>        |        |      |       |      |      |         |      |        |      |            |        |      |
| T1                             | 37.0   | 31.7 | 36.1  | 37.2 | 28.2 | 37.7    | 31.2 | 30.2   | 33.9 | 16.6 (2.2) | 32.7   | 36.1 |
| T2                             | 31.8   | 34.7 | 30.7  | 32.1 | 37.4 | 30.7    | 35.3 | 23.8   | 34.7 | 16.8 (2.1) | 33.1   | 36.1 |
| T3                             | 31.3   | 33.6 | 33.1  | 30.6 | 34.5 | 31.6    | 33.5 | 46.0   | 31.4 | 17.1 (2.5) | 34.2   | 27.9 |
| p-value                        | 0.431  |      | 0.369 |      |      | 0.268   |      | 0.053  |      | 0.073      | 0.609  |      |
| <b>alpha tocopherol [mg/d]</b> |        |      |       |      |      |         |      |        |      |            |        |      |
| T1                             | 36.5   | 31.4 | 31.3  | 38.8 | 31.6 | 35.8    | 33.2 | 31.7   | 33.5 | 16.6 (2.2) | 32.7   | 37.7 |
| T2                             | 34.1   | 33.9 | 36.1  | 31.6 | 32.2 | 33.5    | 32.3 | 19.0   | 34.9 | 16.8 (2.3) | 33.8   | 29.5 |
| T3                             | 29.4   | 34.7 | 32.5  | 29.6 | 36.2 | 30.7    | 34.4 | 49.2   | 31.6 | 17.1 (2.3) | 33.5   | 32.8 |
| p-value                        | 0.332  |      | 0.432 |      |      | 0.651   |      | 0.009* |      | 0.136      | 0.695  |      |

<sup>1</sup> Presented as percentage and tested using Pearson's  $\chi^2$  test for count data; <sup>2</sup> Presented as mean (standard deviation) and tested using one-way analysis of variance; \*p-value <0.05
