# Supplementary material for: Changes in dietary intake during puberty and their determinants: results from the GINIplus birth cohort study
Source: Springer Nature journal article supplement (doi:10.1186/s12889-015-2189-0), 2015-09-01
Supplement: MOESM2 [file 9750220]

## Additional file 2. Comparison of lost-to-follow-up and not-lost-to-follow-up participants

**Table 2** Comparison of lost-to-follow-up and not-lost-to-follow-up participants

|                                                   | LTF            | NLTF           | p-value    |
|---------------------------------------------------|----------------|----------------|------------|
| <b>N</b>                                          | 680            | 1232           |            |
| <b>Sex<sup>1</sup></b>                            |                |                |            |
| Boys                                              | 55.3           | 47.8           | 0.002*     |
| Girls                                             | 44.7           | 52.2           |            |
| <b>Parental education level<sup>1,3</sup></b>     |                |                |            |
| Low ( $\leq 10$ years)                            | 40.1           | 32.7           | 0.002*     |
| High ( $> 10$ years)                              | 59.9           | 67.3           |            |
| <b>Family income level<sup>1,4</sup></b>          |                |                |            |
| Lower                                             | 36.0           | 29.6           | 0.020*     |
| Middle                                            | 32.8           | 37.7           |            |
| Higher                                            | 31.2           | 32.7           |            |
| <b>Child education level<sup>1,3</sup></b>        |                |                |            |
| Low ( $\leq 10$ years)                            | 47.1           | 37.0           | $<0.001$ * |
| High ( $> 10$ years)                              | 52.9           | 63.0           |            |
| <b>Pubertal onset at BL<sup>1</sup></b>           |                |                |            |
| Yes                                               | 27.0           | 29.5           | 0.287      |
| No                                                | 73.0           | 70.5           |            |
| <b>Pubertal stage at FU<sup>1</sup></b>           |                |                |            |
| Pre-pubertal                                      | 0.3            | 0.6            | 0.736      |
| Early puberty                                     | 2.6            | 1.9            |            |
| Mid puberty                                       | 21.2           | 18.8           |            |
| Late puberty                                      | 67.2           | 70.6           |            |
| Post-pubertal                                     | 8.7            | 8.1            |            |
| <b>BMI [kg/m]<sup>2</sup></b>                     | 17.0 (2.4)     | 16.8 (2.3)     | 0.071      |
| <b>Screen-time at BL<sup>1,5</sup></b>            |                |                |            |
| Low ( $\leq 2$ h)                                 | 85.1           | 90.6           | 0.002*     |
| High ( $> 2$ h)                                   | 14.9           | 9.4            |            |
| <b>Age at BL [y]<sup>2</sup></b>                  | 11.0 (0.5)     | 11.0 (0.5)     | 0.877      |
| <b>Energy intake at BL [kcal/day]<sup>2</sup></b> | 1975.1 (581.1) | 1962.4 (542.2) | 0.638      |
| <b>Study center<sup>1</sup></b>                   |                |                |            |
| Munich                                            | 40.1           | 52.5           | $<0.001$ * |
| Wesel                                             | 59.9           | 47.5           |            |
| <b>Study arm<sup>1</sup></b>                      |                |                |            |
| Control group                                     | 54.9           | 55.0           | 1.000      |
| Infant intervention                               | 45.1           | 45.0           |            |

LTF=lost-to-follow-up (data at baseline only); NLTF=not-lost-to-follow-up (data at baseline and follow-up); BL=baseline; FU=follow-up; <sup>1</sup>Presented as percentages, tested by Fisher's exact test (variables with 2 levels), or by Pearson's Chi<sup>2</sup> test (variables with  $> 2$  levels); <sup>2</sup>Presented as mean (standard deviation), tested by t-test; <sup>3</sup>Highest level achieved by mother or father or achievable in the case of child education; <sup>4</sup>Tertiles stratified by study centre and merged; <sup>5</sup> Hours spent on screen-behaviours; \*p-value $<0.05$ .
